1 Attention and Emotion-Enhanced Memory: A  
2 Systematic Review and Meta-Analysis of Behavioural  
3 and Neuroimaging Evidence

4 Zachariah R. Cross<sup>a1</sup>, Amanda Santamaria<sup>a</sup>, Mark J. Kohler<sup>a, b</sup>

5 <sup>a</sup>Centre for Cognitive and Systems Neuroscience, University of South Australia, Adelaide, Australia.

6 <sup>b</sup>Sleep and Chronobiology Laboratory, University of South Australia, Adelaide, Australia.

7 \*Corresponding author: Tel. +61 8302 4375, e-mail: [zachariah.cross@mymail.unisa.edu.au](mailto:zachariah.cross@mymail.unisa.edu.au)

8

9 **ABSTRACT:** The interaction between attention and emotion is posited to influence long-term  
10 memory consolidation. We systematically reviewed experiments investigating the influence of  
11 attention on emotional memory to determine: (i) the reported effect of attention on memory for  
12 emotional stimuli, and (ii) whether there is homogeneity between behavioural and neuroimaging  
13 based effects. Over half of the 47 included experiments found a moderate-to-large effect of attention  
14 on emotional memory as measured behaviourally. However, eye-tracking research provide mixed  
15 support for the role of attention-related processes in facilitating emotional information into long-term  
16 memory. Similarly, modulations in sensory-related components at encoding were not predictive of  
17 long-term memory formation, whereas later components appear to differentially reflect the allocation  
18 of attention to heterogeneous emotional stimuli. This dissociation in neurophysiology is paralleled by  
19 the activation of distinct neural networks under full- and divided-attention conditions. We quantified  
20 the effects of the behavioural, eye-tracking and neuroimaging findings via meta-analysis to show that  
21 the neural substrates of attention-related emotional memory enhancement may be sensitive to specific  
22 methodological parameters.

23

24 **Keywords:** Attention; Emotion; Long-Term Memory; Electroencephalography; Functional Magnetic  
25 Resonance Imaging

---

<sup>1</sup>Correspondence concerning this article should be addressed to Zachariah Cross

## ATTENTION AND EMOTIONAL MEMORY

### 26 **1. Introduction**

27 The presence of an emotional element at encoding results in a memory trade-off, such that  
28 memory for emotional items are enhanced at the cost of memory for neutral information  
29 (Christianson, 1992; Riggs, McQuiggan, Farb, Anderson & Ryan, 2011). Early interpretations of  
30 emotion-enhanced memory are based on motivational models of emotion, which posit that the sensory  
31 system is constrained by a limitation in its processing capacity (Lang, Bradley & Cuthbert, 1998).  
32 Exogenous and endogenous attentional mechanisms allow the brain to deal with a subset of  
33 information that is deemed relevant or salient (LaBar & Cabeza, 2006; Okon-Singer, Hendler, Pessoa  
34 & Shackman, 2015; Vuilleumier, 2005). Thus, a trade-off in memory for emotional over neutral  
35 information may occur through attentional narrowing, whereby attention is rendered to emotional  
36 information for enhanced sensory processing (Chipchase & Chapman, 2013; Riggs et al., 2011).  
37 Mounting evidence supports this claim, suggesting emotional memory – the encoding and retrieval of  
38 an environmental or cognitive event that elicits an emotional response at the time of its occurrence –  
39 depends in part on attentional processes at encoding (Kensinger, 2009; Kensinger, Piguet, Krendl &  
40 Corkin, 2005; Riggs et al., 2011).

41 Behavioural studies illustrate that attention is modulated by emotion, whereby attention is drawn  
42 more rapidly to positive or aversive rather than neutral stimuli (Mackay et al., 2004; Kang, Wang,  
43 Surina & Lü, 2014). Studies demonstrating this finding often utilise the dot probe task (DPT), which  
44 requires subjects to simultaneously respond to stimuli varying in emotional valence (Mather &  
45 Carstensen, 2003). Research using this paradigm report slower reaction times for emotional compared  
46 to neutral stimuli of various modalities (e.g., auditory or visual stimuli) and of different stimulus  
47 types, such as images (Mather & Carstensen, 2003; Sakaki, Niki & Mather, 2012) and single words  
48 (Aquino & Arnell, 2007; Sharot & Phelps, 2004). Combined, this suggests emotional information is  
49 prioritised supramodally across sensory systems (Brosch & Van Bavel, 2012).

50 Electrophysiological (Carretié, Martín-Loeches, Hinojosa & Mercado, 2001; Schupp, Flaisch,  
51 Stockburger & Junghofer, 2006) and neuroanatomical studies (Sakaki et al., 2012; Smith, Henson,  
52 Rugg & Dolan, 2004; Smith, Stephan, Rugg & Dolan, 2006) report preferential neural activation

## ATTENTION AND EMOTIONAL MEMORY

53 patterns to emotional relative to neural stimuli from various brain regions. Electroencephalographic  
54 (EEG) research demonstrates a robust modulation in event-related potential (ERP) components by  
55 emotional stimuli (Zhang, Liu, An, Yang & Wang, 2015). Negative and positive compared to neutral  
56 stimuli elicit enhanced amplitudes in early sensory-related ERPs, and ERPs associated with elaborate  
57 stimulus evaluation, such as the P1 (Delplanque, Lavoie, Hot, Silvert & Sequeira, 2004), and late  
58 positive potential (LPP; Langeslag, Olivier, Kohlen, Nijs & Strien, 2015), respectively. The P1 is  
59 most pronounced at occipital regions and is modulated by attention (Delplanque et al. 2004), while the  
60 LPP is a positive-going waveform that is morphologically similar to the P3 (Luck, 2014). Analogous  
61 to the P3, the LPP may partially reflect the release of norepineprine from the brainstem Locus  
62 Coeruleus (LC), which innervates to the amygdala and hippocampal formation (Brown, Wee,  
63 Noorden, Giltay & Nieuwenhuis, 2015; Samuels & Szabadi, 2008). These innervations may facilitate  
64 cortical reorientation to emotionally significant events, promoting emotion-enhanced memory  
65 (Brown, Steenbergen, Band, Rover & Nieuwenhuis, 2012; Brown et al., 2015).

66 Neuroanatomical research (Keightley et al., 2003; Talmi, Anderson, Riggs, Caplan &  
67 Moscovitch, 2008; Vuilleumier et al., 2002) demonstrates that emotional memory is encoded and  
68 consolidated over neutral information due to interactions between the amygdala and fronto-parietal  
69 attentional networks, and the influence of the amygdala on the hippocampus during consolidation  
70 (Talmi et al., 2008; Taylor & Fragopanagos, 2005; Vuilleumier, 2005). In a meta-analysis of  
71 functional magnetic resonance (fMRI) studies (Murty, Ritchey, Adcock & LaBar, 2010), it was  
72 demonstrated that successful encoding of emotional information activated widespread neural  
73 networks, involving the ventral visual stream, hippocampal complex (i.e. anterior and posterior  
74 parahippocampal gyrus; PHG) and right ventral parietal cortex, as illustrated in Figure 1. These  
75 findings are analogous to magnetoencephalographic (MEG; Peyk, Schupp, Elbert & Junghofer, 2008;  
76 Keuper et al., 2014) research, which reveals emotional information is processed hierarchically,  
77 localised to occipital-parietal regions in early time windows (e.g., 120 – 170 ms), to more anterior,  
78 temporal regions in later time windows (e.g., 220 – 330 ms).

## ATTENTION AND EMOTIONAL MEMORY

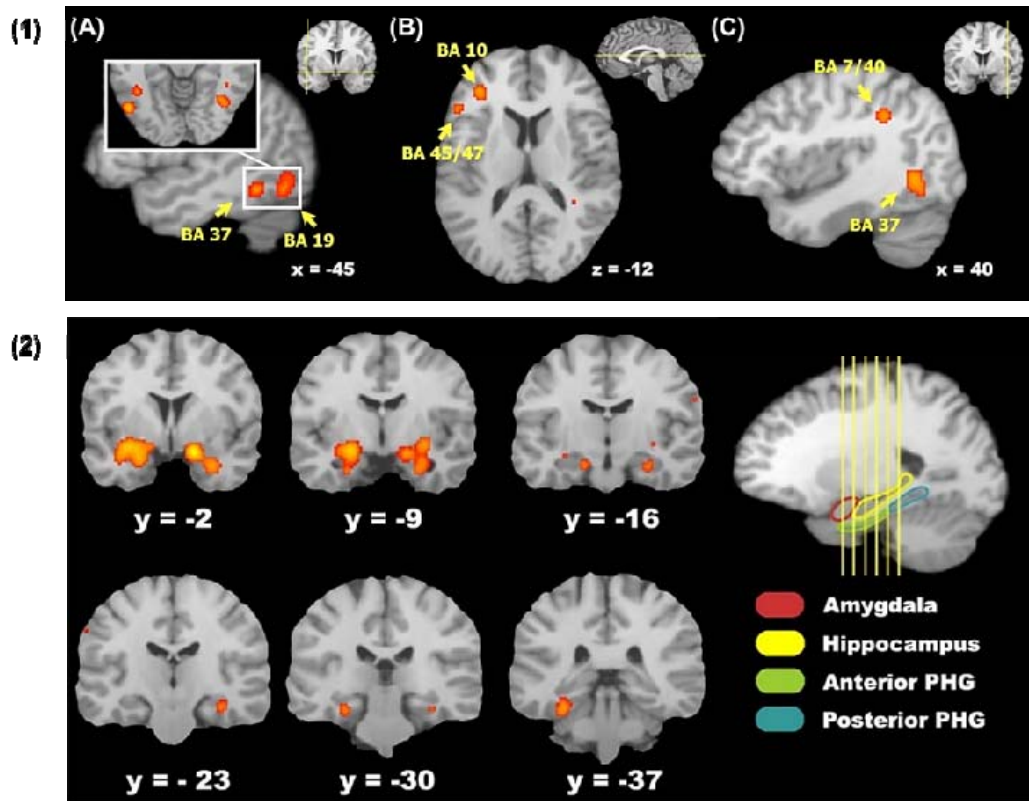

79

80 **Figure 1.** Activation likelihood map from a meta-analysis of 20 fMRI studies reported by Murty and  
81 colleagues (2010). (1) Regions showing reliable cortical activations in the ventral visual stream (A),  
82 the left prefrontal cortex; (B), and the right parietal cortex (C). (2) Regions showing reliable co-  
83 activation patterns between the amygdala and medial temporal lobe systems during encoding of  
84 emotional stimuli. Adapted from “fMRI studies of successful emotional memory encoding: A  
85 quantitative meta-analysis” by V. P. Murty, M. Ritchey, R. A. Adock, K. S. LaBar, 2010,  
86 *Neuropsychologia*, 48, p. 3462-3463, Copyright 2017 with permission from Elsevier (License  
87 number: 4232580453335).

88 There is compelling evidence to suggest attention and emotion interact to substantially influence  
89 sensory processing and memory consolidation (Schupp et al., 2006; Talmi et al., 2008). However,  
90 despite the breadth of research, behavioural and neuroimaging studies of the attention-emotional  
91 memory interface report mixed findings. Studies of eye movements demonstrate equal fixation time to  
92 negative and neutral items, while at recall, memory is enhanced for negative stimuli, but reduced for  
93 neutral items (Christiansan, Loftus, Hoffmann & Loftus, 1991; Riggs et al., 2011; Wessel, Van Der

## ATTENTION AND EMOTIONAL MEMORY

94 Kooy & Merckelbach, 2000). Further, electrophysiological findings, such as modulations in ERPs at  
95 encoding, often do not predict enhanced emotional memory performance at recall (Herbert et al.,  
96 2008; Keuper et al. 2014; Kissler, Herbert, Winkler & Junghofer, 2009).

97 To date there has been no attempt to systematically determine whether experimental research  
98 supports the role of attention in emotional LTM. In particular, a comprehensive review linking overt  
99 behavioural responses to changes in attention- and emotion-sensitive ERPs, and to the activation of  
100 cortical and subcortical brain networks has not yet been conducted. Systematically reviewing the  
101 behavioural and neuroimaging evidence of attention and emotional LTM may help to identify factors  
102 that characterise disorders that have an attentional preference for aversive events, such as anxiety and  
103 mood disorders (Lang et al., 2003; Leppänen, 2006). Such work would also help to illuminate the way  
104 in which the central nervous system prioritises information when its processing capacity is  
105 constrained, which may be particularly relevant for predictive-coding-based theories of brain function  
106 (e.g., Friston, 2010).

107 The current study aimed to determine whether attention significantly impacts memory for  
108 emotional stimuli. To this end, we systematically reviewed experiments investigating the influence of  
109 attention on emotional long-term memory (LTM) to determine: (i) if the literature demonstrates an  
110 effect of attention on memory for emotional stimuli; and (ii) whether there is homogeneity between  
111 behavioural, electrophysiological, and neuroanatomical correlates for the effect of attention on LTM  
112 for emotional information, and to quantify these effects via meta-analysis. A further aim of this  
113 review was to explore differences in the methodologies employed and provide suggestions for future  
114 emotional memory and attention research.

## 115 **2. Method**

116 This systematic review was conducted according to the Preferred Reporting Items for Systematic  
117 Reviews and Meta-Analyses (PRISMA) guidelines (Liberati et al., 2009). PubMed, PsychInfo and  
118 Medline databases were searched on November 9, 2016. The search terms 'Emotion\*', 'Memory',  
119 and 'Attention\*' were used. A total of 8319 articles were identified and 2929 duplicates later

## ATTENTION AND EMOTIONAL MEMORY

120 removed. To be eligible for inclusion, articles had to be written in English, conducted with young  
121 adults (i.e., 18 – 35; Holland & Kensinger, 2012), included an assessment of emotional memory, and  
122 employed a measure of attention as it relates to memory processes (i.e., encoding, consolidation, or  
123 retrieval) for emotional stimuli. Further, only articles that were original, peer-reviewed research were  
124 included in the review. Articles from all publication years were accepted.

125 Exclusion criteria included studies with samples diagnosed with psychiatric disorders (e.g.,  
126 depression, anxiety, and schizophrenia), studies conducted with infants and children (i.e., 17 years and  
127 under) or with middle and older adults (i.e., 36 years and above). However, where possible, data were  
128 extracted for the age group of interest from cross-sectional studies (e.g., Mather & Carstensen, 2003)  
129 that included a sample of young adults. Studies without full methodologies, without a measure of  
130 memory *and* attention, case studies and reviews, and/or studies that examined working memory as the  
131 measure of memory, were also excluded.

132 The primary reviewer (ZC) screened all titles and abstracts to determine eligibility. Articles that  
133 appeared to be eligible were sourced for full-text and reference lists of these articles were screened by  
134 title and abstract to ensure all eligible articles were included. Two reviewers (ZC and AS) screened  
135 eligible abstracts and full-text articles based on review criteria. Disagreements between reviewers  
136 were addressed through discussion; however, if the two reviewers did not reach a consensus, a third  
137 reviewer (MK) was consulted. The following data were extracted from all included articles:  
138 participant sample size, age and gender ratio, measure of attention (method and outcome measure),  
139 study characteristics (type of stimuli, study paradigm and recall interval) and major findings,  
140 separated by behavioural and neuroimaging (i.e., electrophysiological and neuroanatomical) results.  
141 Available effect sizes (i.e.,  $d$ ,  $\eta^2$ ,  $r$ , and  $\beta$ ) were reported for relevant major findings.

## ATTENTION AND EMOTIONAL MEMORY

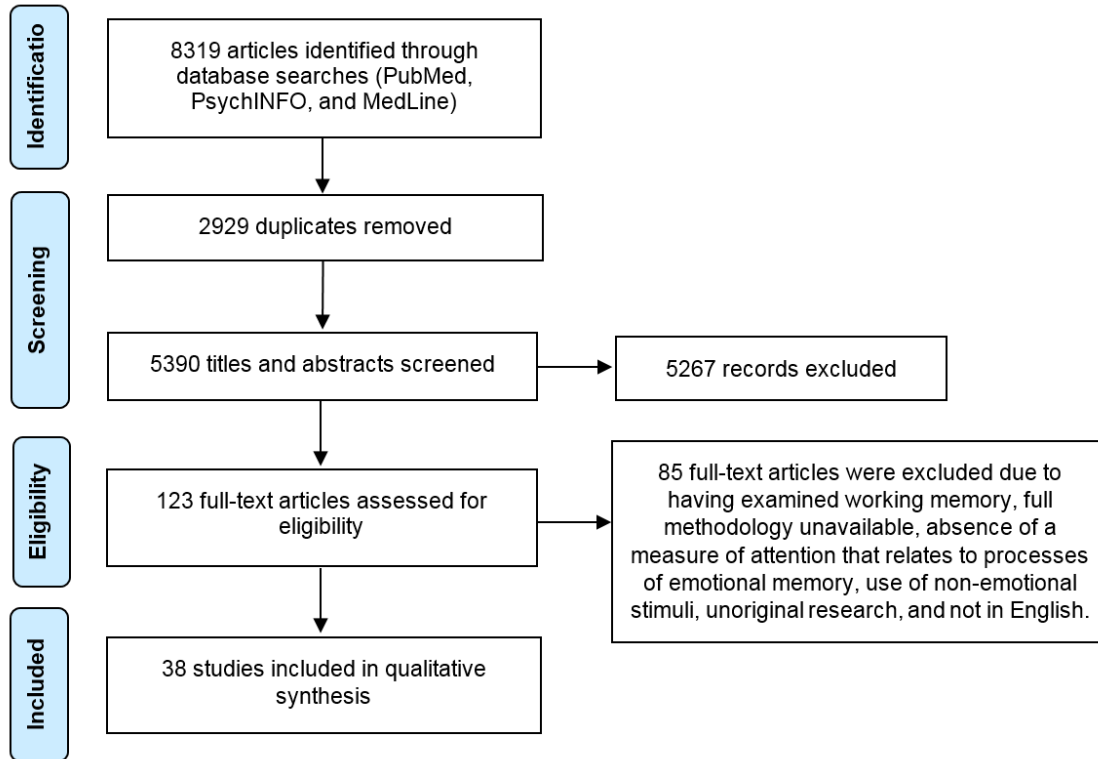

142  
143 **Figure 2.** PRISMA flow diagram (Liberati et al., 2009) of the article screening and selection process.

144 The databases searched included PubMed, PsychInfo, and MedLine.

### 145 2.1. Statistical analysis

146 Estimates of effect sizes were calculated using Pearson's  $r$ , which is a valid effect size measure  
147 that is easily interpretable, and produces a measure between 0 (i.e., no relationship) and  $\pm 1$  (perfect  
148 relationship; Field & Gillett, 2010). An  $r$  value of .10 is interpreted as a small effect, 0.30 as a  
149 moderate effect, and 0.50 as a large effect (Chatburn, Lushington, & Kohler, 2014; Cohen, 1992). The  
150 Hedges and Vevea (1998) random-effects model was used to calculate the meta-analysis. Random  
151 effects models are an appropriate method as they enable inferences to be made beyond the studies  
152 included in the meta-analysis, and are recommended to be the norm in psychological research (Field  
153 & Gillett, 2010). Of the 38 studies included in the systematic review, 32 provided data that were able  
154 to be converted into  $r$  values (i.e.,  $M$  and  $SD$ ,  $F$  statistic,  $p$  value, Cohen's  $d$ ,  $\chi^2$ , and  $\beta$ ). In order to  
155 dissociate behavioural and neuroimaging effects, we calculated four separate random-effects models.  
156 In the first model, we included all 32 studies in order to obtain an overall effect of attention on  
157 emotional memory consolidation. We then calculated separate models for studies that employed

## ATTENTION AND EMOTIONAL MEMORY

158 behavioural, eye-tracking and neuroimaging (EEG/fMRI) measures. Analyses of publication bias  
159 were also computed, including Rosenthal's fail safe  $N$ , and a random-effects publication bias model  
160 (Vevea & Woods, 2005).

### 161 **3. Results**

162 Figure 2 illustrates the flow of article selection, in accordance with Liberatie et al. (2009). 123  
163 full-text articles were read for eligibility. 85 articles were excluded due to meeting one or more of the  
164 exclusion criteria. In total, 38 articles were included. A summary of the key study characteristics are  
165 provided in Table 1. Articles with behavioural and neuroimaging (i.e., EEG, fMRI) data are presented  
166 first, followed by articles consisting of single behavioural experiments. Articles with multiple eligible  
167 experiments are summarised last.



**Table 1.** Summary of studies included in the systematic review ordered by neuroimaging, behavioural, and articles with multiple experiments.

| Article                    |            | Participants |        |                      | Measure of Attention |                      |                       | Study Characteristics                   |                 |                                                                                                                         | Major Findings                                                                                                                                                                          |  |
|----------------------------|------------|--------------|--------|----------------------|----------------------|----------------------|-----------------------|-----------------------------------------|-----------------|-------------------------------------------------------------------------------------------------------------------------|-----------------------------------------------------------------------------------------------------------------------------------------------------------------------------------------|--|
| Author(s)                  | Experiment | n            | Gender | Age (Range/SD)       | Method               | Outcome              | Stimuli Type          | Paradigm                                | Recall Interval | Behavioural                                                                                                             | Neuroimaging                                                                                                                                                                            |  |
| Herbert et al. (2008)      | na         | 16           | 8 M    | 27 (na)              | EEG                  | P1, N1, EPN          | Words                 | Encoding; free recall                   | 30 minutes      | Memory greater for positive than negative & neutral words. No difference in memory for negative & neutral.              | No difference in P1 & N1 amplitudes for any emotion. EPN amplitude greater for positive & negative than neutral words.                                                                  |  |
| Keuper et al. (2014)       | na         | 20           | 9 M    | na (Range=21 - 31)   | EEG/MEG              | P1, EPN              | Words                 | Encoding; free recall                   | Immediate       | Memory was greater for negative & positive than neutral words.                                                          | P1 greater in MTG for emotional than neutral words. EPN greater for positive & negative words. EPN pronounced in supramarginal gyrus, occipital and limbic lobes                        |  |
| Kissler et al. (2009)      | na         | 20           | 10 M   | 23.9 (Range=20 - 31) | EEG                  | P1, N1, EPN, LPP     | Words                 | Encoding; free recall                   | 30 minutes      | Positive words were recalled with greater accuracy than neutral & negative words.                                       | No difference in N1 and P1 amplitude for any emotional word type. EPN larger for positive and negative versus neutral words. LPP larger for positive versus neutral and negative words. |  |
| Koenig & Mecklinger (2008) | na         | 20           | 10 M   | 21 (Range=18 - 23)   | EEG                  | Posterior Positivity | Images                | Encoding; cued recall                   | 2.5 minutes     | Memory greater for positive than negative & neutral images.                                                             | Posterior positivity greater for positive & negative than neutral images.                                                                                                               |  |
| Talmi et al. (2008)        | na         | 11           | 6 M    | 24.43 (SD=6.23)      | fMRI                 | BOLD Responses       | Images                | FA or DA encoding; recognition test.    | 10 minutes      | No difference in memory in FA. Memory greater for emotional than neutral images under DA ( $\eta^2=.33$ ).              | BOLD response in amygdala and posterior visual streams to negative images in DA only.                                                                                                   |  |
| Zhang et al. (2015)        | na         | 14           | 7 M    | na (Range=20 - 25)   | EEG                  | P2                   | Scenes; Neutral words | Encoding; distraction; cued recognition | 1 minute        | Memory greater for words encoded in a neutral context compared to words encoded in a negative context ( $\eta^2=.54$ ). | Increased P2 amplitude to positive & negative contexts ( $\eta^2=.19$ ).                                                                                                                |  |

## ATTENTION AND EMOTIONAL MEMORY

| Article                 |            | Participants |        |                         | Measure of Attention   |                               | Study Characteristics |                            |                    | Major Findings                                                                                                                                                                                                |                                                                                                                                          |
|-------------------------|------------|--------------|--------|-------------------------|------------------------|-------------------------------|-----------------------|----------------------------|--------------------|---------------------------------------------------------------------------------------------------------------------------------------------------------------------------------------------------------------|------------------------------------------------------------------------------------------------------------------------------------------|
| Author(s)               | Experiment | n            | Gender | Age<br>(Range/SD)       | Method                 | Outcome                       | Stimuli<br>Type       | Paradigm                   | Recall<br>Interval | Behavioural                                                                                                                                                                                                   | Neuroimaging                                                                                                                             |
| Langeslag et al. (2015) | na         | 20           | 5 M    | 21.1<br>(Range=18 - 28) | EEG                    | LPP                           | Words                 | Encoding; free recall      | Immediate          | Memory greater for emotional than neutral words.                                                                                                                                                              | Increase in LPP amplitude to emotional but not neutral words.                                                                            |
| Barnacle et al. (2016)  | na         | 22           | 0 M    | 26 (na)                 | fMRI                   | BOLD signal                   | Images                | Encoding; free recall      | Immediate          | Memory greater for emotional items in mixed lists only ( $d=.38$ ).                                                                                                                                           | Greater activation of ventral attention network for emotional stimuli in mixed lists ( $r=.65$ ).                                        |
| Bennion et al. (2013b)  | na         | 126          | na     | 22.4<br>(Range=18 - 34) | Eye Tracker & fMRI     | BOLD signal/fixation duration | Scenes                | Encoding; recognition test | 12 hours           | Fixation duration & cortisol predicted memory for negative objects across sleep but not wake                                                                                                                  | Higher cortisol was associated with greater fixation duration and activity in amygdala and vmPFC at retrieval, but only for sleep group. |
| Chan & Singhal (2015)   | na         | 25           | 13 M   | 21.1<br>(Range=18 - 30) | Driving Simulator/ EEG | NSW                           | Words                 | Encoding; free recall test | Immediate          | Memory greater for negative than neutral words ( $\eta^2=.39$ ).                                                                                                                                              | NSW amplitude smaller for negative than neutral words ( $\eta^2=.33$ )                                                                   |
| Clemens et al. (2015)   | na         | 29           | 14 M   | 34.31<br>(SD=9.29)      | fMRI                   | BOLD signal                   | Faces                 | Encoding; recognition test | Immediate          | na                                                                                                                                                                                                            | Positive correlation between insula/TPJ and the FFG during encoding on recognition performance ( $r = 0.56$ ).                           |
| Riggs et al. (2011)     | na         | 24           | 3 M    | 19.17 (na)              | Eye Tracker            | Fixation Time                 | Scenes                | Encoding; cued recall      | 10 minutes         | Eye fixations greater for negative than neutral central pictures, but not peripheral. Memory greater for negative than neutral pictures ( $d=.58$ ). Eye fixations partially mediated memory ( $\beta=.11$ ). | na                                                                                                                                       |
| Aquino & Arnell (2007)  | na         | 13           | 7 M    | 19.7<br>(Range=18 - 22) | DPT                    | Reaction Time                 | Words                 | DA encoding; free recall   | Immediate          | DPT RT greater for emotional than neutral words. Memory greater for emotional than neutral words.                                                                                                             | na                                                                                                                                       |

## ATTENTION AND EMOTIONAL MEMORY

| Article                    |            | Participants |        |                         | Measure of Attention |                           | Study Characteristics |                                |                    | Major Findings                                                                                                                                                                 |              |
|----------------------------|------------|--------------|--------|-------------------------|----------------------|---------------------------|-----------------------|--------------------------------|--------------------|--------------------------------------------------------------------------------------------------------------------------------------------------------------------------------|--------------|
| Author(s)                  | Experiment | n            | Gender | Age<br>(Range/SD)       | Method               | Outcome                   | Stimuli<br>Type       | Paradigm                       | Recall<br>Interval | Behavioural                                                                                                                                                                    | Neuroimaging |
| Chan & Singhal (2013)      | na         | 30           | na     | 21.4<br>(SD=2.5)        | Driving Simulator    | Reaction Time             | Words                 | DA encoding; free recall       | 2 minutes          | Faster RT for neutral & positive than negative words. Memory greater for negative than neutral & positive words.                                                               | na           |
| Chang & Choi (2014)        | na         | 56           | 25 M   | 23<br>(Range=19 - 25)   | Eye Tracker          | Gaze duration             | Narrative; images     | Encoding; free recall          | Immediate          | Gaze duration predicted memory for narratives ( $\beta=.57$ ), but not images ( $\beta=.08$ ).                                                                                 | na           |
| Humphreys et al. (2010)    | na         | 21           | 6 M    | na<br>(Range=19 - 32)   | Eye Tracker          | Total Inspection Duration | Paired Images         | Encoding; recognition test     | 7 days             | Longer eye fixations toward & greater memory for negative than neutral pictures.                                                                                               | na           |
| Maddox et al. (2012)       | na         | 36           | 14 M   | 19.11<br>(SD=0.82)      | ADT                  | Memory Performance        | Words                 | DA or FA encoding; cued recall | Immediate          | ADT accuracy worse when paired with negative words. Memory greater for negative words under DA. Memory greater for positive & negative than neutral under FA ( $\eta^2=.39$ ). | na           |
| Kim et al. (2013)          | na         | 61           | 61 M   | 26.3<br>(SD=3.7)        | Eye Tracker          | Fixation Time             | Paired Images         | Encoding; free recall          | 10 minutes         | Fixation time greater for negative than neutral images. Memory greater for emotional than neutral images.                                                                      | na           |
| Chipchase & Chapman (2013) | 3          | 36           | 12 M   | 20.51<br>(SD=3.70)      | Eye-Tracker          | Fixation Time             | Scenes                | Encoding; recognition test     | 30 minutes         | Fixation time greater for negative central images, but not peripheral ( $\eta^2=.95$ ). Memory greater for negative images ( $\eta^2=.19$ ).                                   | na           |
| Wessel et al. (2000)       | 3          | 180          | na     | 18.8<br>(Range=17 - 27) | Eye Tracker          | Fixation Time             | Scenes                | Encoding; recognition test     | 10 minutes         | Longer fixations to negative than neutral items. Greater memory for negative than neutral items.                                                                               | na           |

## ATTENTION AND EMOTIONAL MEMORY

| Article                      |            | Participants |        |                       | Measure of Attention |                    | Study Characteristics |                                      |                    | Major Findings                                                                                                                                         |              |
|------------------------------|------------|--------------|--------|-----------------------|----------------------|--------------------|-----------------------|--------------------------------------|--------------------|--------------------------------------------------------------------------------------------------------------------------------------------------------|--------------|
| Author(s)                    | Experiment | n            | Gender | Age<br>(Range/SD)     | Method               | Outcome            | Stimuli<br>Type       | Paradigm                             | Recall<br>Interval | Behavioural                                                                                                                                            | Neuroimaging |
| Sharot & Phelps (2004)       | na         | 50           | 21 M   | na<br>(Range=18 – 28) | DPT                  | Memory Performance | Words                 | Encoding; IR and DR recognition test | 24 hours           | No difference in memory for negative & neutral at IR; memory greater for negative at DR.                                                               | na           |
| Sharot et al. (2008)         | na         | 69           | na     | na<br>(Range=18 – 35) | Eye Tracker          | Fixation Time      | Scenes                | Encoding; recognition test           | 45 minutes         | Fixation time greater for negative than neutral scenes. No difference in memory between neutral & negative scenes.                                     | na           |
| Steinmetz & Kensinger (2013) | 1          | 39           | 21 M   | na<br>(Range=18 – 21) | Eye Tracker          | Fixation Time      | Scenes                | Encoding; recognition test           | 30 minutes         | Fixation time was equal between emotion categories ( $r^2=.10$ ). Memory was greater for negative components of scenes ( $r^2=.55$ ).                  | na           |
| Srinivasan & Gupta (2010)    | 2          | 17           | na     | 24.6<br>(SD=2.44)     | Letter String        | Response Accuracy  | Faces                 | DA encoding; recognition test        | Immediate          | Letter String RTs were slower for emotional than neutral faces. Memory was greater for positive than negative & neutral faces.                         | na           |
| Evaraert & Koster (2015)     | na         | 49           | 4 M    | na<br>(Range=18 – 32) | Eye Tracker          | Fixation Time      | Scrambled Sentences   | Encoding; incidental memory test     | 3 minutes          | Sustained attention (fixation time; $\beta=.31$ ), but not attentional selection; $\beta=.06$ ) toward stimuli predicted retrieval of emotional items. | na           |
| Talmi & MacGarry (2012)      | 1          | 72           | 19 M   | 19.26<br>(SD=2.12)    | ADT                  | Memory Performance | Images                | DA or FA encoding; free recall       | 1 minute           | ADT RTs longer for negative images ( $r^2=.77$ ). Memory greater for negative images in DA ( $d=.90$ ), but no difference in FA.                       | na           |

## ATTENTION AND EMOTIONAL MEMORY

| Article                         |            | Participants |        |                          | Measure of Attention |                      | Study Characteristics |                                            |                    | Major Findings                                                                                                                          |              |
|---------------------------------|------------|--------------|--------|--------------------------|----------------------|----------------------|-----------------------|--------------------------------------------|--------------------|-----------------------------------------------------------------------------------------------------------------------------------------|--------------|
| Author(s)                       | Experiment | n            | Gender | Age<br>(Range/SD)        | Method               | Outcome              | Stimuli<br>Type       | Paradigm                                   | Recall<br>Interval | Behavioural                                                                                                                             | Neuroimaging |
| Bi & Han<br>(2015)              | na         | 28           | 14 M   | na<br>(Range=18 – 31)    | Eye Tracker          | Fixation Duration    | Images                | Encoding; recognition test                 | Immediate          | Greater fixation toward negative than positive and neutral stimuli ( $\eta^2=.23$ ). Memory greater for negative than positive stimuli. | na           |
| Chan et al.<br>(2016)           | na         | 30           | 13 M   | 19.5<br>(SD=3.3)         | Driving Simulator    | Memory Performance   | Words                 | Encoding; surprise free recall test        | Immediate          | No difference in memory between negative, positive and neutral words.                                                                   | na           |
| MacKay et al.<br>(2015)         | 2          | 40           | 12 M   | 19.18<br>(SD=1.13)       | ST                   | Memory Accuracy      | Words                 | Encoding; surprise recognition memory test | Immediate          | Better memory for taboo than neutral words ( $\eta^2=.38$ ).                                                                            | na           |
| Ziaei et al.<br>(2015)          | na         | 37           | 17 M   | 18.97<br>(Range=18 – 29) | Eye Tracker          | Pupillary Responses  | Images                | Encoding; recognition memory task          | 10 Minutes         | Larger pupil sizes for positive targets presented with negative distractors relative to neutral distractors ( $d=.42$ )                 | na           |
| Pichora-Fuller et al.<br>(2016) | 2          | 12           | 3 M    | 18.7<br>(SD=1.2)         | ADT                  | Recognition Accuracy | Words                 | DA encoding; free recall                   | Immediate          | Recall accuracy higher for emotional relative to neutral words in noise relative to quiet condition ( $\eta^2=.09$ )                    | na           |
| Mather & Carstensen<br>(2003)   | 1          | 52           | 22 M   | 25.8<br>(SD=5.6)         | DPT                  | Reaction Time        | Faces                 | DA encoding; free recall                   | 10 minutes         | No difference in DPT RTs for any emotion. Memory greater for emotional than neutral faces.                                              | na           |
|                                 | 2          | 44           | 16 M   | 25.4<br>(SD=4.8)         | DPT                  | Reaction Time        | Faces                 | DA encoding; recognition test              | 10 minutes         | No difference in DPT RTs for any emotion. Memory greater for negative than neutral & positive faces.                                    | na           |
| Chapman et al.<br>(2012)        | 1          | 51           | 15 M   | 18.4 (na)                | LDT                  | Reaction Time        | Images                | DA or FA encoding; free recall task        | 10 or 45 minutes   | LDT RT longer for emotional images. Memory greater after 45min.                                                                         | na           |

## ATTENTION AND EMOTIONAL MEMORY

| Article              |            | Participants |        |                        | Measure of Attention |                        | Study Characteristics |                                     |                    | Major Findings                                                                                                          |              |
|----------------------|------------|--------------|--------|------------------------|----------------------|------------------------|-----------------------|-------------------------------------|--------------------|-------------------------------------------------------------------------------------------------------------------------|--------------|
| Author(s)            | Experiment | n            | Gender | Age<br>(Range/SD)      | Method               | Outcome                | Stimuli<br>Type       | Paradigm                            | Recall<br>Interval | Behavioural                                                                                                             | Neuroimaging |
|                      | 2          | 23           | 10 M   | 22.8 (na)              | LDT                  | Reaction Time          | Images                | FA or DA encoding; free recall task | 45 minutes         | LDT RTs greater for emotional than neutral images. Memory greater for emotional than neutral images.                    | na           |
|                      | 3          | 50           | 20 M   | 21.2 (na)              | LDT                  | Reaction Time          | Images                | FA or DA encoding; recognition test | 7 days             | LDT RTs greater for emotional than neutral images. Memory greater for emotional than neutral images.                    | na           |
| Sakaki et al. (2012) | 1          | 22           | 14 M   | 21.09<br>(SD=2.36)     | DPT                  | Reaction Time          | Images                | DA encoding; recognition test       | 5 minutes          | DPT RTs greater for emotional than neutral images. Memory greater for emotional than neutral images.                    | na           |
|                      | 2          | 48           | 21 M   | 22.19<br>(SD=2.03)     | ADT                  | Memory Performance     | Images                | DA or FA encoding; recognition test | 3 minutes          | Memory greater for emotional compared to neutral in FA and DA.                                                          | na           |
| Kang et al. (2014)   | 1          | 90           | 45 M   | 20.16<br>(Range=19-24) | ADT                  | Memory Performance     | Words                 | FA or DA encoding; recognition test | 3 minutes          | Memory greater for negative-arousing words than neutral and negative- non-arousing words in DA but not FA ( $d=1.96$ ). | na           |
|                      | 2          | 90           | 45 M   | 21.83<br>(Range=18-23) | ADT                  | Memory Performance     | Words                 | FA or DA encoding; recognition test | 3 minutes          | Memory greater for positive-arousing than positive non-arousing words in FA                                             | na           |
| MacKay et al. (2004) | 1          | 28           | 10 M   | 20 (na)                | ST                   | Colour naming accuracy | Words                 | DA; recall test                     | Immediate          | ST RT longer for negative words. Memory greater for negative words.                                                     | na           |
|                      | 2          | 48           | 24 M   | 19.8 (na)              | ST                   | Memory Accuracy        | Words                 | DA; free recall test                | Immediate          | Memory for coloured Stroop words was greater for negative than neutral words.                                           | na           |

## ATTENTION AND EMOTIONAL MEMORY

| Article                    |            | Participants |        |                         | Measure of Attention     |                       | Study Characteristics |                                        |                    | Major Findings                                                                                                                                                          |              |
|----------------------------|------------|--------------|--------|-------------------------|--------------------------|-----------------------|-----------------------|----------------------------------------|--------------------|-------------------------------------------------------------------------------------------------------------------------------------------------------------------------|--------------|
| Author(s)                  | Experiment | n            | Gender | Age<br>(Range/SD)       | Method                   | Outcome               | Stimuli<br>Type       | Paradigm                               | Recall<br>Interval | Behavioural                                                                                                                                                             | Neuroimaging |
| Talmi et al.<br>(2007)     | 1          | 48           | 16 M   | 19.02<br>(SD=1.9)       | ADT                      | Memory<br>Performance | Images                | DA or FA encoding; free<br>recall      | 50 minutes         | ADT RTs longer for<br>emotional images.<br>Memory greater for<br>negative & positive<br>than for neutral<br>images ( $\eta^2=.18$ ).                                    | na           |
|                            | 2          | 48           | 20 M   | 21.19<br>(SD=3.35)      | Encoding<br>Instructions | Memory<br>Performance | Scenes                | DA encoding; free recall               | 50 minutes         | Memory greater for<br>negative than neutral<br>images ( $\eta^2=.42$ ).                                                                                                 | na           |
| Steinmetz<br>et al. (2014) | 1          | 39           | 20 M   | na<br>(Range=18-<br>22) | Eye Tracker              | Eye Gaze              | Scenes                | FA or DA encoding;<br>recognition test | 30 minutes         | Eye gaze did not<br>differ between DA &<br>FA ( $\eta^2=.65$ ). Memory<br>greater for negative<br>scenes in DA.                                                         | na           |
|                            | 2          | 46           | 25 M   | 19.7                    | Eye Tracker              | Eye Gaze              | Scenes                | FA or DA encoding;<br>recognition test | 10 minutes         | Eye gaze greater<br>toward negative<br>central images. No<br>difference in memory<br>for negative & neutral<br>scenes. Memory<br>greater for negative<br>central items. | na           |
|                            | 3          | 42           | 20 M   | na<br>(Range=18-<br>22) | Eye Tracker              | Eye Gaze              | Scenes                | Encoding; recognition test             | 30 minutes         | Memory greater for<br>negative & positive<br>peripheral items than<br>neutral under DA.                                                                                 | na           |

*Note.* *M* = Mean; *SD* = Standard Deviation; *M* = Male; *EEG* = Electroencephalography; *na* = Not Available; *EPN* = Early Posterior Negativity; *BOLD* = Blood Oxygen Level Dependent Signal; *FA* = Full Attention; *DA* = Divided Attention;  $\eta^2$  = Partial Eta Squared; *d* = Cohen's *d*; *fMRI* = Functional Magnetic Resonance Imaging; *LPP* = Late Positive Potential; *NSW* = Negative Slow Wave; *DPT* = Dot Probe Task; *RT* = Reaction Time;  $\beta$  = Beta Weight; *r* = Pearson's *r*; *ADT* = Auditory Detection Task; *IR* = Immediate Recall; *DR* = Delayed Recall; *LDT* = Line Location Discrimination Task; *ST* = Stroop Task.

## ATTENTION AND EMOTIONAL MEMORY

156 Of the 38 articles reviewed, 7 reported multiple relevant experiments, resulting in 47 experiments  
157 being included. All experimental methodologies were examined and the following behavioural  
158 measures of attention were included: eye-tracking, DPT, driving simulator, ADT, encoding  
159 instructions provided by researchers, letter string, LDT, and the Stroop task.

160 This review identified 11 experiments that examined the neurobiological correlates of attention  
161 and emotional memory. Seven experiments used EEG to derive ERP components including the P1,  
162 N1, P2, early posterior negativity (EPN), posterior positivity and LPP, while one study used MEG  
163 (Keuper et al., 2014) to derive event-related magnetic fields (ERF). Four studies employed fMRI  
164 (e.g., Talmi et al., 2008) and measured the BOLD signal to index attention to emotional stimuli at  
165 encoding.

### 166 *3.1. Measures of emotional memory*

167 One study used stimuli from the Affective Norms for English Words (ANEW; e.g., Chan &  
168 Singhal, 2013), while twelve studies used the International Affective Picture System (IAPS; e.g.,  
169 Chapman et al., 2012; Humphreys et al., 2010; Koenig & Mecklinger, 2008; Riggs et al., 2011; Talmi  
170 & MacGarry, 2012; Talmi et al., 2007; Talmi et al., 2008; Zhang et al., 2015). Three studies used  
171 emotionally valenced faces (e.g., Clemens et al., 2015; Mather & Carstensen, 2003; Srinivasan &  
172 Gupta, 2010), while one study used images and emotional narratives (Chang & Choi, 2014).  
173 Remaining studies (30) derived stimuli from previous studies (e.g., established sets used by Payne,  
174 Stickgold, Swanberg & Kensinger, 2008) or Google Images. All studies without standardised stimuli  
175 generated inter-rater reliability estimates from expert judges and/or gained valence and arousal ratings  
176 from participants (e.g., Maddox et al., 2012; Sakaki et al., 2012).

177 Two studies (Humphreys et al., 2010; Kim et al., 2013) presented pairs of images (e.g., neutral-  
178 negative, neutral-neutral, positive-negative, and positive-neutral) to participants at encoding. Twelve  
179 experiments used emotional scenes, involving a central negative or neutral item with a neutral or  
180 negative peripheral background image, respectively. The remaining 33 experiments presented single  
181 stimuli for participants to learn.



## ATTENTION AND EMOTIONAL MEMORY

182

### 183 3.2. *Paradigms*

184 Twenty-four experiments used a passive encoding paradigm, requiring participants to view  
185 stimuli passively for a set time with stimulus presentation ranging from one to six seconds. Of the 47  
186 experiments reviewed, 23 had full- and divided-attention paradigms, requiring participants to encode  
187 stimuli while engaging in a second task (e.g., DPT or ADT). Twenty-six experiments used cued  
188 recognition tests to assess participants' memory, involving participants responding to previously seen  
189 stimuli intermixed with new distractor stimuli. Twenty-one of the 47 experiments used a free recall  
190 paradigm, requiring participants to write down as many stimuli as they could remember with no time  
191 constraints.

### 192 3.3. *Recall intervals*

193 Thirty-two percent of studies tested immediate recall performance, 19% had a recall interval of  
194 less than five minutes, 32% of studies had a recall interval of between ten and thirty minutes, while  
195 8.5% of studies employed a recall interval of between 45 – 60 minutes and 8.5% of greater than 60  
196 minutes. All studies using short recall interval (i.e., <5 minutes – 60 minutes) had participants  
197 complete filler tasks, such as simple arithmetic.

### 198 3.4. *Behavioural measures of attention*

#### 199 3.4.1. *Auditory discrimination task*

200 Seven experiments used an ADT to assess the effect of DA at encoding of emotional memory.  
201 All experiments reported significant effects of attention, such that when attention was divided  
202 between encoding and the ADT, memory was greater for negative than neutral and positive stimuli.  
203 Three experiments (Maddox et al., 2012; Kang et al., 2014; Talmi & MacGarry, 2012) reported  
204 greater memory for negative than neutral and positive stimuli under DA, but greater memory for  
205 negative and positive than neutral stimuli under full attention (FA).

206

## ATTENTION AND EMOTIONAL MEMORY

207

### 208 *3.4.2. Dot probe task*

209 Five experiments examined the effect of the DPT on emotional memory. Two studies (Aquino  
210 & Arnell, 2007; Sakaki et al., 2012) reported longer reaction times to negative than neutral stimuli,  
211 which translated into greater memory for negative stimuli at immediate recall and after a five minute  
212 recall interval. One study (Sharot & Phelps, 2004) reported no difference in memory for negative and  
213 neutral words at immediate recall; however, when memory was tested after 24 hours, memory was  
214 enhanced for negative stimuli, but diminished for neutral stimuli.

215 One study containing two experiments (Mather & Carstensen, 2003) reported no statistically  
216 significant difference in DPT reaction times for negative and neutral faces. However, memory was  
217 significantly greater for negative faces after a ten minute recall interval. This finding was replicated  
218 using positive faces, whereby memory for negative faces was greater than memory for neutral and  
219 positive faces.

### 220 *3.4.3. Driving simulator*

221 Three studies used a driving simulator to test attention to emotional items (Chan & Singhal,  
222 2013, 2015; Chan et al., 2016). Participants were required to respond via a button on a steering wheel  
223 when a target stimulus (neutral word) appeared on a billboard. Reaction times were slower when the  
224 target stimulus was paired with negative and positive words. In two of the studies (Chan & Singhal,  
225 2013, 2015), memory was greater for positive and negative than neutral words after a two minute  
226 recall interval. The study with non-significant results (Chan et al., 2016) tested participants' memory  
227 immediately after the encoding phase.

### 228 *3.4.4. Encoding instructions*

229 Using emotional scenes, one experiment (Talmi et al., 2007) instructed participants to pay  
230 attention to central items and to ignore peripheral objects. However, memory was significantly greater

## ATTENTION AND EMOTIONAL MEMORY

231 for central and peripheral negative objects than central and peripheral neutral objects after a 50 minute  
232 recall interval.

### 233 *3.4.5. Eye-tracking*

234 Fifteen experiments used eye-tracking as a measure of overt attention. Two experiments  
235 (Humphreys et al., 2010; Kim et al., 2013) using paired-pictures reported greater fixations to negative  
236 than neutral images, which translated into enhanced memory for negative over neutral items at recall.  
237 One experiment (Chang & Choi, 2014) reported that gaze duration predicted memory for emotional  
238 narratives but not for emotional images, while another study (Bi & Han, 2015) found that greater  
239 fixation time toward negative than positive and neutral stimuli predicted memory performance for  
240 negative stimuli. Of the 15 experiments, one (Ziaei et al., 2015) measured pupillary responses, and  
241 reported larger pupil sizes for positive targets presented with negative distractors relative to neutral  
242 distractors, which translated into greater memory for positive items.

243 Of the seven studies using emotional scenes, one experiment (Sharot et al., 2008) reported no  
244 difference in memory between negative and neutral stimuli, despite greater fixations for negative than  
245 neutral central and peripheral objects at encoding. The remaining six studies (Bennion et al., 2013b;  
246 Chipchase & Chapman, 2013; Riggs et al., 2011; Steinmetz & Kensinger, 2013; Steinmetz et al.,  
247 2014; Wessel et al., 2000) reported longer fixations to negative than neutral central items, but no  
248 difference in the length of fixations to negative and neutral peripheral images. All six studies reported  
249 greater memory performance for negative, relative to neutral, central and peripheral items. However,  
250 one study (Bennion et al., 2013b) also included a sleep group (i.e. compared sleep versus wake  
251 interval between learning and retrieval), and found that fixation duration predicted memory for  
252 negative objects across sleep but not wake.

253 In two of three experiments reported by Steinmetz et al. (2014), gaze duration did not differ  
254 between negative, neutral and positive scenes in the DA condition. After a 30 minute recall interval,  
255 memory performance was greater for negative compared to positive, neutral peripheral and central  
256 items. In the third experiment, gaze duration was greater toward negative central, but not peripheral

## ATTENTION AND EMOTIONAL MEMORY

257 items; however, after a ten minute recall interval, memory performance was greater for central and  
258 peripheral negative items than central and peripheral neutral items.

259 The one study (Evaraert & Koster, 2015) that examined the effect of attention (i.e., fixation  
260 time) on retrieval of emotional memory reported a significant effect of sustained attention toward  
261 positive and negative items, but a non-significant effect of attentional selection on recollection of  
262 emotional words embedded in scrambled sentences.

### 263 *3.4.6. Letter string*

264 One study used the Letter String task to assess the effect of attention on memory for emotional  
265 faces (Srinivasan & Gupta, 2010). Participants were required to indicate on a button box whenever the  
266 letter 'N' was present in a string of letters that were superimposed on a face. Letter string reaction  
267 times were significantly longer for negative and positive compared to neutral faces; however, memory  
268 was greater for positive than neutral and negative faces at immediate recall.

### 269 *3.4.7. Line location discrimination task*

270 One article (Chapman et al., 2012) reporting three experiments used the line LDT; a  
271 computerised task requiring participants to indicate whether a line appears above or below a stimulus.  
272 In all three experiments, negative images elicited slower LDT reaction times relative to neutral  
273 stimuli. Further, memory was greater for negative than neutral stimuli at all three recall intervals (10  
274 minutes, 45 minutes, and 7 days). However, memory for negative images was equivalent after a 45  
275 minute delay relative to 10 minute recall interval and this effect maintained after a seven day recall  
276 interval. Memory for neutral items was reduced after the 45 minute and 7 day recall intervals relative  
277 to the 10 minute recall interval.

### 278 *3.4.8. Stroop task*

279 Two articles used the Stroop task to assess the role of attention in emotional memory (MacKay et  
280 al., 2004, 2015). In both studies, participants were required to name the colour of neutral and negative  
281 words. In the first study (MacKay et al., 2004), reaction times were longer for negative than neutral

## ATTENTION AND EMOTIONAL MEMORY

282 words at encoding, which led to enhanced memory for negative words at immediate recall. In the  
283 second study (MacKay et al., 2015), memory was better for negative versus neutral words.

### 284 *3.5. Electrophysiological and neuroanatomical measures of attention*

#### 285 *3.5.1. Event-related potentials/fields*

286 Three studies investigated modulations in P1 in response to emotional words (Herbert et al.,  
287 2008; Keuper et al., 2014; Kissler et al., 2009). No study reported statistically significant differences  
288 in the amplitude of the P1 between negative, neutral, and positive word types. All three experiments  
289 reported greater memory for positive than neutral, and negative words after a 30 minute (Herbert et  
290 al., 2008; Kissler et al., 2009) and immediate (Keuper et al., 2014) recall interval. Two of these three  
291 experiments examined modulations in N1 amplitude to emotional words (Herbet et al., 2008; Kissler  
292 et al., 2009). Both studies reported no statistically significant difference in N1 amplitude to positive,  
293 negative, and neutral words.

294 One study reported significant effects for the P2, such that positive and negative images elicited  
295 an increase in P2 amplitude relative to neutral images (Zhang et al., 2015). Memory for neutral words  
296 that were superimposed on positive and negative images was poorer compared to neutral words  
297 superimposed on neutral images, demonstrating an emotion-enhanced memory trade-off.

298 Two studies examined the EPN (Herbert et al., 2008; Keuper et al., 2014). Both studies  
299 employed emotional words and reported greater EPN amplitude toward positive and negative than  
300 neutral words. There was no difference in EPN amplitude between positive and negative words. Using  
301 MEG, Keuper et al. (2014) reported greater ERFs within the time window of the P1 (80 – 120ms) in  
302 the middle temporal gyrus for emotional compared to neutral words. Greater ERFs within the EPN  
303 time window (200 – 300ms) were observed in the supramarginal gyrus, occipital lobe (cuneus and  
304 precuneus) and limbic lobe (posterior cingulate cortex) for emotional compared to neutral words.

305 One study reported increased posterior positivity amplitude to positive and negative versus  
306 neutral images, which correlated with greater memory performance for positive and negative images  
307 (Koenig & Mecklinger, 2008). Similarly, two experiments examined the LPP and reported increases

## ATTENTION AND EMOTIONAL MEMORY

308 in LPP amplitude to emotional relative to neutral words (Kissler et al., 2009; Langeslag et al., 2015).  
309 Memory performance was greater for emotional than neutral words at immediate recall. Finally, one  
310 experiment (Chan & Singhal, 2015) reported reduce negative slow wave (NSW) amplitude for  
311 negative versus neutral words, which was coupled with enhanced memory for negative over neutral  
312 words at immediate recall.

### 313 *3.5.2. Functional magnetic resonance imaging*

314 Using fMRI, four studies measured the blood oxygen-level dependent (BOLD) signal to index  
315 attention to emotional stimuli. Talmi et al. (2008) reported greater BOLD responses in the amygdala  
316 and posterior visual streams to negative than for neutral images under DA but not under FA. There  
317 was no difference in memory between negative and neutral images under FA, but greater memory for  
318 emotional than neutral images under DA was reported. Similarly, Barnacle et al. (2016) reported  
319 greater activation of the ventral attention network during the encoding of emotional images in mixed  
320 (i.e. emotional mixed with neutral stimuli) but not pure lists, which was associated with enhanced  
321 memory for emotional over neutral items at recall.

322 Clemens et al. (2015) reported positive correlations between activity in the insula/TPJ and FFG  
323 during encoding on recognition memory. Finally, using concurrent eye-tracking, cortisol assaying and  
324 fMRI, Bennion et al. (2013b) found that higher cortisol during encoding was associated with greater  
325 fixation duration toward negative stimuli, which predicted activity in the amygdala and vmPFC at  
326 retrieval. Interestingly, this effect was only present for across a period containing sleep, such that  
327 memory for negative items was greater after a period of sleep versus wake, and this was mediated by  
328 cortisol levels at encoding.

### 329 *3.6. Meta-analysis*

330 The meta-analysis contained 32 studies, comprising an overall sample of 1291 young adults. As  
331 per Brewin et al. (2007), we averaged effects for studies that reported multiple relevant effect sizes, so  
332 that each experiment contributed a single data point to the overall model (see Table 3 for a summary  
333 of the studies included in the meta-analysis). The mean pooled effect size for attention on emotional

## ATTENTION AND EMOTIONAL MEMORY

334 long-term memory was .40 ( $p < .001$ , 95% CI = [.32, .48]). This indicates a moderate effect, with a  
335 significant  $z$  of 9.058,  $p < .001$ . Separate analyses revealed a moderate-to-large mean effect for  
336 behavioural ( $r = .46$ ,  $p < .001$ , 95% CI = [.29, .54],  $z = 5.704$ ,  $p < .001$ ) and neuroimaging ( $r = .54$ ,  $p$   
337  $< .001$ , 95% CI = [.40, .65],  $z = 6.777$ ,  $p < .001$ ) studies, and a small-to-moderate mean effect for eye-  
338 tracking studies ( $r = .31$ ,  $p < .001$ , 95% CI = [.19, .42],  $z = 5.003$ ,  $p < .001$ ). Note that chi-square tests  
339 for homogeneity of variance were not significant for any of the models (see Table 2 for a summary of  
340 the homogeneity tests for each model). However, based on recommendations by Field and Gillett  
341 (2010) and Chatburn et al. (2014), random-effects models were used, as there is likely to be large  
342 variance in attention for various types of emotional stimuli – both behaviourally and neurobiologically  
343 – in the larger population. Thus, the insignificant chi-square tests are likely to reflect the small  
344 number of studies (32), rather than a lack of variability between experiments. Meta-analysis results  
345 are illustrated in Figure 4.

346 **Table 2.** Chi-square tests for homogeneity of variance for the four random-effects models.

| Model        | $\chi^2$ | $df$ | $p$   | $n$ |
|--------------|----------|------|-------|-----|
| Main         | 28.37    | 31   | 0.602 | 32  |
| Behavioural  | 10.26    | 12   | 0.592 | 13  |
| Eye-Tracking | 10.76    | 11   | 0.463 | 12  |
| Neuroimaging | 4.07     | 6    | 0.667 | 7   |

347 *Note.*  $n$  = number of studies.

### 348 3.7. Publication bias

349 Several analyses were performed to examine potential publication bias. Rosenthal's fail safe  
350  $N$  indicated that 1936 studies with negative findings would need to be excluded for the population  
351 effect size estimate to be non-significant. To further examine potential publication bias, a random-  
352 effects publication bias model (Vevea & Woods, 2005) was computed. A moderate two-tailed  
353 selection bias model reduced the overall effect size to 0.37, while a severe two-tailed selection bias  
354 model yielded an adjusted effect size of 0.34. From this perspective, if there were publication biases  
355 in the meta-analytic sample, the effects would be minimal, given that the adjusted effect size estimates  
356 remained moderate.

**Table 3.** Sample size, effect size, lower and upper 95% confidence intervals, measure, stimuli and recall interval for studies included in the meta-analysis. Studies are ranked based on largest to smallest effect size.

| Study                                        | <i>n</i>    | <i>r</i>   | Lower 95% CI         | Upper 95% CI | Measure          | Stimuli | Recall Interval |
|----------------------------------------------|-------------|------------|----------------------|--------------|------------------|---------|-----------------|
| Talmi et al. (2008)                          | 11          | 0.80       | 0.38                 | 0.94         | fMRI             | Images  | 10 minutes      |
| Talmi et al. (2007)                          | 48          | 0.73       | 0.56                 | 0.84         | Instructions     | Images  | 50 minutes      |
| Kang et al. (2014)                           | 90          | 0.69       | 0.56                 | 0.78         | ADT              | Words   | 3 minutes       |
| Barnacle et al. (2016)                       | 22          | 0.65       | 0.31                 | 0.84         | fMRI             | Images  | Immediate       |
| Chang & Choi (2014)                          | 56          | 0.64       | 0.45                 | 0.77         | Eye-Tracking     | Words   | Immediate       |
| Chan & Singhal (2015)                        | 25          | 0.57       | 0.22                 | 0.78         | EEG              | Words   | Immediate       |
| Clemens et al. (2015)                        | 29          | 0.56       | 0.24                 | 0.76         | fMRI             | Images  | Immediate       |
| Chipchase & Chapman (2013)                   | 36          | 0.53       | 0.25                 | 0.73         | Eye-Tracking     | Images  | 30 minutes      |
| Srinivasan & Gupta (2010)                    | 17          | 0.48       | 0.00                 | 0.78         | Letter String    | Images  | Immediate       |
| MacKay et al. (2004)                         | 28          | 0.47       | 0.12                 | 0.72         | ST               | Words   | Immediate       |
| Bi & Han (2015)                              | 28          | 0.47       | 0.12                 | 0.72         | Eye-Tracking     | Images  | Immediate       |
| MacKay et al. (2015)                         | 40          | 0.44       | 0.24                 | 0.61         | ST               | Words   | Immediate       |
| Koenig & Mecklinger (2008)                   | 20          | 0.44       | 0.00                 | 0.74         | EEG              | Images  | 2.5 minutes     |
| Zhang et al. (2015)                          | 14          | 0.43       | -0.13                | 0.78         | EEG              | Words   | 1 minute        |
| Talmi & MacGarry (2012)                      | 72          | 0.41       | 0.19                 | 0.58         | ADT              | Images  | 1 minute        |
| Sakaki et al. (2012)                         | 48          | 0.41       | 0.14                 | 0.62         | ADT              | Images  | 3 minutes       |
| Steinmetz et al. (2014)                      | 39          | 0.41       | 0.11                 | 0.64         | Eye-Tracking     | Images  | 30 minutes      |
| Sharot & Phelps (2004)                       | 25          | 0.40       | 0.01                 | 0.68         | DPT              | Words   | 24 hours        |
| Chan & Singhal (2013)                        | 30          | 0.39       | 0.15                 | 0.59         | EEG              | Words   | Immediate       |
| Bennion et al. (2013b)                       | 24          | 0.37       | -0.03                | 0.67         | Eye-Tracker/fMRI | Images  | 12 hours        |
| Sharot et al. (2008)                         | 69          | 0.33       | 0.10                 | 0.52         | Eye-Tracking     | Images  | 45 minutes      |
| Steinmetz & Kensinger (2013)                 | 36          | 0.31       | -0.01                | 0.58         | Eye-Tracking     | Images  | 30 minutes      |
| Pichora-Fuller et al. (2016)                 | 12          | 0.30       | -0.33                | 0.74         | ADT              | Words   | Immediate       |
| Maddox et al. (2012)                         | 36          | 0.28       | 0.05                 | 0.55         | ADT              | Words   | Immediate       |
| Kim et al. (2013)                            | 61          | 0.23       | -0.02                | 0.45         | Eye-Tracking     | Images  | 10 minutes      |
| Evaraert & Koster (2015)                     | 49          | 0.20       | -0.08                | 0.45         | Eye-Tracking     | Words   | 3 minutes       |
| Ziaei et al. (2015)                          | 37          | 0.20       | -0.13                | 0.49         | Eye-Tracking     | Images  | 10 minutes      |
| Mather & Carstensen (2003)                   | 44          | 0.13       | -0.07                | 0.32         | DPT              | Images  | 10 minutes      |
| Riggs et al. (2011)                          | 24          | 0.10       | -0.35                | 0.52         | Eye-Tracking     | Images  | 10 minutes      |
| Wessel et al. (2000)                         | 180         | 0.05       | -0.23                | 0.34         | Eye-Tracking     | Images  | 10 minutes      |
| Humphreys et al. (2010)                      | 18          | -0.01      | -0.47                | 0.45         | Eye-Tracking     | Images  | 7 days          |
| Chapman et al. (2012)                        | 23          | -0.06      | -0.46                | 0.35         | LDT              | Images  | 45 minutes      |
| <b>Meta-Analytic Average for Main Effect</b> | <b>1291</b> | <b>.40</b> | <b>[-0.32, 0.48]</b> |              |                  |         |                 |

*Note.* *n* = sample size; *r* = correlation coefficient; CI = confidence interval; fMRI = functional magnetic resonance imaging; EEG = electroencephalography; ADT = auditory detection task; ST = Stroop task; DPT = dot probe task; LDT = line dissection task. The dashed lines separate studies with high (>0.50), moderate (0.30 – 0.49) and low (<0.29) effect sizes.



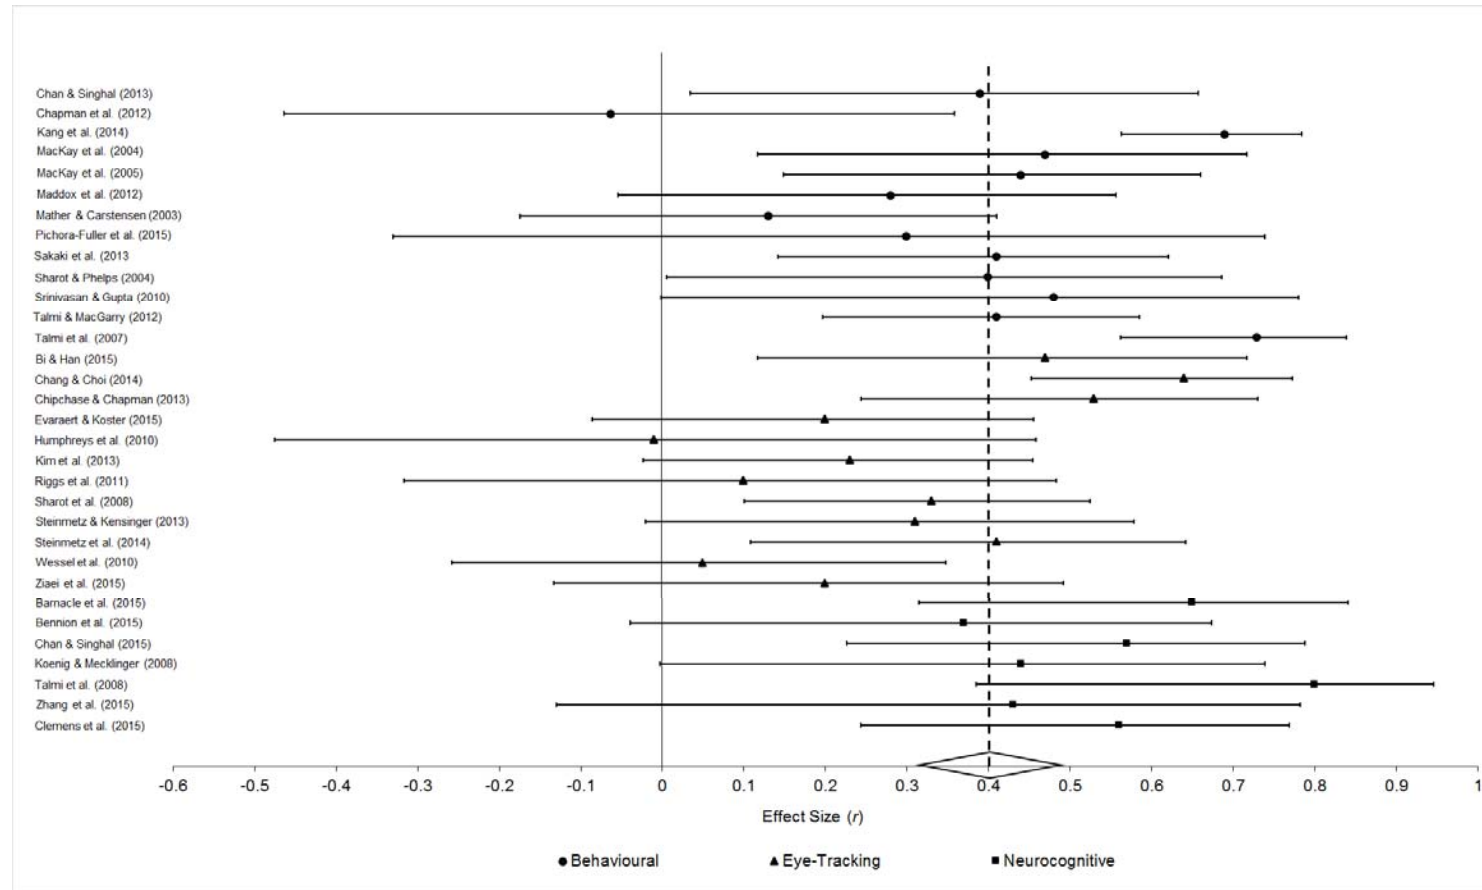

**Figure 3.** Forest plot for the effect ( $r$ ) of attention on emotional long-term memory for behavioural, eye-tracking and neuroimaging studies. Circles indicate behavioural findings; triangles indicate eye-tracking findings; squares indicate neuroimaging (EEG/fMRI) findings. Bars indicate the 95% confidence intervals of each effect. The studies corresponding to each effect are listed on the left. The diamond and dashed line located at the bottom of the figure indicate the mean meta-analytic effect size with 95% confidence intervals.

## ATTENTION AND EMOTIONAL MEMORY

### 354 **4. Discussion**

355 A total of 47 experiments across 38 studies were included in this systematic review, 32 of which  
356 were subject to meta-analysis. These studies utilised various behavioural, electrophysiological, and  
357 neuroanatomical measures to investigate the effect of attention on emotional memory consolidation.  
358 Of the behavioural studies included, over half reported statistically significant effects of attention on  
359 emotional memory, suggesting attention modulates emotional memory consolidation. The use of DA  
360 paradigms (e.g., Maddox et al., 2012; Kang et al., 2014; Talmi & MacGarry, 2012) provide the  
361 majority of behavioural evidence for these effects. However, we found largely inconsistent evidence  
362 for the role of overt attention in emotional memory for experiments utilising eye-tracking, which were  
363 corroborated by ERP experiments that reported null effects in early sensory-related potentials, but  
364 modulations in later components. A discussion of the discrepancy between the behavioural,  
365 electrophysiological and neuroanatomical findings is presented below, followed by suggestions for  
366 future research.

#### 367 *4.1. Behavioural effects of attention on emotional memory*

368 The greatest effects on emotional memory were observed in DA paradigms, where participants  
369 attended to a secondary task during encoding. Experiments utilising the ADT (e.g., Maddox et al.,  
370 2012) and DPT (e.g., Aquino & Arnell, 2007) reported longer reaction times in response to emotional  
371 relative to neutral stimuli, suggesting attentional resources are preferentially allocated to salient  
372 relative to neutral information for elaborate evaluation. Across experiments, longer reaction times  
373 resulted in enhanced memory performance at recall. This emotional slowing may be explained by  
374 inhibitory effects of emotion on selective attention, whereby attention is inhibited by emotional cues,  
375 resulting in a slowing of responses to secondary tasks, such as the ADT and DPT (Bradley, 2009).  
376 This provides support for an attentional narrowing account of emotional memory, wherein emotional  
377 information interferes with cognitive and motor goals that prepare responses to incoming stimuli,  
378 reducing evaluation of less salient information and facilitating emotional information into LTM  
379 (Taylor & Fragopanagos, 2005).

## ATTENTION AND EMOTIONAL MEMORY

354 Studies measuring eye movements suggest attention does not entirely account for the effect of  
355 emotion on memory. Utilising fixation time as a measure of overt attention, two experiments  
356 conducted mediation analyses to test the relationship between attention and emotional memory (Kim  
357 et al., 2013; Riggs et al., 2011). Both studies reported that the direct path between emotion and  
358 memory for central items remained significant when attention was fixed. Further analyses revealed  
359 that the indirect path between attention and memory for peripheral objects was not significant, such as  
360 that memory for negative peripheral objects remained greater than for neutral peripheral objects,  
361 irrespective of processing time (e.g., fixation time).

362 This discrepancy between eye movements and behavioural responses lends support to the  
363 argument that post-encoding processes are more critical for the consolidation of emotional  
364 information than heightened attention at encoding (Kim et al., 2013; Riggs et al., 2011). However, it  
365 is potentially problematic to assume that eye movements can be used as direct measures of overt  
366 attention, and thus predictors of behavioural outcomes. From a predictive-coding-based view of the  
367 brain, eye movements serve to gather data from the environment to test beliefs about the current  
368 internal model of the world (Friston et al., 2012). This account of eye movements is based on the free-  
369 energy principle, which posits biological agents act upon the world according to encoded  
370 representations of sensations, and that adaptive responses to the environment occur under conditions  
371 within which sampled sensations match internal predictions (Friston, 2010; Joffily & Coricelli, 2013).  
372 An emotional stimulus that is congruent with an individual's internal model may therefore elicit  
373 shorter fixations than a stimulus that is not, suggesting emotional information may serve to regulate  
374 the learning rate of a biological agent rather than directly reflecting modulations in attentional  
375 orientation (Joffily & Coricelli, 2013). Therefore, although attentional narrowing models are  
376 consistent with behavioural effects, more research is needed to understand the brain mechanisms  
377 underpinning the role of attention in emotional LTM.

### 378 *4.2. Neural basis of attention-related emotional memory enhancement*

379 Although there is a breadth of research reporting the behavioural correlates of attention and  
380 emotional memory, few experiments have investigated the electrophysiological and neuroanatomical

## ATTENTION AND EMOTIONAL MEMORY

354 correlates of this relationship. Eleven (23%) experiments included in this review examined the  
355 electrophysiological and neuroanatomical correlates of attention and emotional memory. Modulations  
356 in sensory-related ERP components at encoding were not related to behavioural performance at recall.  
357 All studies examining modulations of the P1 and N1 in response to emotional words at encoding  
358 reported nonsignificant effects of emotion on their amplitude or latency (Herbert et al., 2008; Kissler  
359 et al., 2009). Prior research demonstrates that the P1 and N1 are modulated when attentional state is  
360 under demand (for review: Schupp et al., 2006), suggesting single word-based stimuli and scene  
361 imagery may be better indexed by later components, such as the P2 and EPN (Herbert et al., 2008).

362 The P2 is suggested to index post-perceptual selective attention and is sensitive to visual target  
363 detection, such that P2 amplitude has been reported to increase when target stimuli are detected  
364 among distractor objects (Kanske, Plitschka & Kotz, 2011). In one experiment, P2 amplitude  
365 increased in response to emotional words imbedded in complex visual scenes, and was associated  
366 with superior memory performance for emotional relative to neutral stimuli at recall (Zhang et al.,  
367 2015). In this experiment, neutral words were superimposed on emotionally valenced backgrounds, a  
368 paradigm more complex than the passive paradigms utilised by studies investigating the P1 and N1.  
369 The P2 may therefore represent a top-down attentional influence on emotion evaluation, particularly  
370 when presented alongside neutral stimuli, and may index attention-related cortical networks that  
371 facilitate emotional information into LTM (Carretié et al., 2004; Crowley & Colrain, 2004).

372 The EPN proceeds the P2 and is thought to index selective attention to specific stimulus features  
373 (Junghöfer, Bradley, Elbert & Lang, 2001). Included studies reported enhanced EPN amplitude to  
374 emotional relative to neutral stimuli, suggesting increased visual processing of emotional stimuli, and  
375 a prioritisation of emotional over neutral information. However, these components may reflect post-  
376 attentive, elaborate stimulus evaluation, rather than early attentional orientation (Low, Lang &  
377 Bradley, 2005; Thorpe, Fize & Marlot, 1996). For example, Low et al. (2005) systematically  
378 demonstrated that the EPN is modulated by picture content (objects vs people) and picture type  
379 (central vs peripheral items) above that of emotionality, suggesting the EPN reflects selective  
380 attention rather than the automatic detection and evaluation of emotion. However, the studies

## ATTENTION AND EMOTIONAL MEMORY

354 examining the EPN included in the meta-analysis used emotionally valenced words, and each reported  
355 greater EPN amplitude in response to emotional compared to neutral words. Moreover, using MEG,  
356 Keuper et al. (2014) reported that the EPN was generated from occipital and limbic lobes, suggesting  
357 possible functional connectivity between primary visual cortices and the amygdala. This may  
358 subserve selective attention to, and the preferential processing of emotional information, which  
359 accords with fMRI research (for review: Murty et al., 2010).

360 In contrast to sensory-related components (i.e. N1, P1), the amplitudes of the posterior positivity  
361 and LPP were larger in response to emotional relative to neutral stimuli. The posterior positivity has  
362 been hypothesised to reflect attentional capturing mechanisms during early stages of the processing  
363 cascade (i.e. 250 – 450 ms; Koenig & Mecklinger, 2008). Similarly, the LPP has been likened to a  
364 P3b response, in the sense that the LPP is considered a sensitive measure of attentional orientation to  
365 salient information (Schupp et al., 2006). Importantly, the studies investigating the modulation of  
366 sensory-related components did not manipulate attention, and therefore, under a biased competition  
367 model of attention, there was no demand on processing resources in the relevant sensory cortex (i.e.  
368 visual or auditory cortices). This is in contrast to the posterior positivity and LPP, where irrespective  
369 of attentional conditions, they were still modulated by emotion. From this perspective, the N1 and P1  
370 may serve to gate incoming sensory information via bottom-up processing mechanisms. During later  
371 processing stages, components such as the LPP may facilitate enhanced memory via the release of  
372 norepineprine from the LC in response to emotionally salient stimuli, which would promote synaptic  
373 plasticity via afferent inputs to the hippocampal complex and amygdala (Tully & Bolshakov, 2010).

374 All fMRI studies reported significant effects ( $r = 0.37 - 0.80$ ) of attention on emotional memory,  
375 and revealed a distributed network of cortical and subcortical regions during the encoding of  
376 emotional stimuli under varying attentional conditions. Studies consistently revealed greater bilateral  
377 amygdala activation in response to emotional relative to neutral stimuli. When attention was divided,  
378 two studies (Barnacle et al., 2016; Tamli et al., 2008) reported greater activation of the ventral  
379 attention network, which predicted enhanced memory performance at recall for emotional relative to  
380 neutral stimuli. The ventral attention network – which includes the anterior insula, anterior cingulate

## ATTENTION AND EMOTIONAL MEMORY

354 cortex and temporo-parietal junction – is involved in reorienting attention to task-relevant stimuli  
355 (Corbetta & Shulman, 2002; Fragopanagos & Taylor, 2006). However, greater activation of the  
356 ventral attention network in response to emotional stimuli under DA accords with evidence indicating  
357 that this processing stream is susceptible to emotionally salient information irrespective of task-  
358 relevance (for review: Frank & Sabatinelli, 2012). From this perspective, during top-down, goal-  
359 directed processing, the ventral attention network is critical for detecting bottom-up, stimulus-driven  
360 changes; however, emotional stimuli appear to have privilege access to attention, which in turn,  
361 promotes emotion-enhanced memory. This interpretation is consistent with behavioural experiments  
362 that report memory for emotional stimuli is enhanced under DA compared to FA, and lends support to  
363 the argument that attention is a strong predictor for long-term emotional memory consolidation.

364 Taken together, attention at encoding is a strong predictor of long-term emotional memory.  
365 Effects of attention are moderate at the behavioural level, while the largest effects are born from  
366 neuroimaging (EEG/fMRI) studies. In contrast, while still significant, eye-tracking studies provide the  
367 weakest effects of attention on the emotional modulation of LTM, suggesting a dissociation between  
368 eye movements and neural activity. This apparent discrepancy might be explained by the diversity in  
369 stimuli used, the length of time between encoding and recall, and the experimental paradigms used to  
370 manipulate attention. Although these differences make it difficult to establish whether emotional  
371 memory benefits more from enhanced attention at encoding, or from preferential post-encoding  
372 processes, they provide testable hypotheses for future research, which we discuss below.

### 373 *4.3. Limitations of included studies and future directions*

374 The heterogeneity between behavioural and neuroimaging studies may be due to differences in  
375 recall intervals (immediate recall versus a 24 hour consolidation period), stimuli type (words, faces,  
376 images, and scenes) and measures of attention (DPT vs EEG), as emotional memory is sensitive to  
377 these methodological parameters (Bennion, Ford, Murray & Kensinger, 2013a; Riggs et al., 2011).  
378 Specifically, all fMRI and eye-tracking studies used emotionally valenced images, while the majority  
379 of EEG studies used emotional words. Similarly, the studies which have a recall interval of 12hrs or  
380 longer (e.g., Bennion et al., 2013b; Humphreys et al., 2010) report lower effects than studies with

## ATTENTION AND EMOTIONAL MEMORY

354 immediate recall. Accordingly, to determine the effect of attention on emotional LTM, stimuli type  
355 and recall intervals need to be better controlled across experiments. The field would also benefit from  
356 the direct comparison of image-based versus word-based tasks in terms of differences in  
357 electrophysiological and neuroanatomical attention-related responses at encoding, and further,  
358 determine whether memory depends on these processes, or relies more heavily on consolidation  
359 processes.

360 Experiments examining early sensory-related ERPs, such as the P1 and N1, reported no difference  
361 in amplitude between emotional word types. Previous research using oddball tasks containing images  
362 report significant modulations on the amplitude of the P1 and N1 components, as opposed to the  
363 passive viewing paradigms involving words typically employed when investigating attention and  
364 emotion (Carretie´ et al., 2004; Delplanque et al., 2004). As such, further research is needed that  
365 adopts attention-demanding paradigms at encoding using images rather than words. This will allow  
366 for stronger interferences to be made regarding the influence that attention-modulated, sensory-related  
367 ERPs have on emotional LTM.

368 It is well established that stimulus type can bias participants' memory responses, such that  
369 emotion can modify the qualitative features of how stimuli are remembered; a change that is  
370 measurable depending on the memory variables used (e.g., familiarity, recognition accuracy;  
371 Bennion et al., 2013a). As this review did not account for specific memory performance measures, it  
372 is unclear if the behavioural and neural correlates of attention interact with qualitative changes in  
373 emotional memory. This is important to consider given that compared to familiarity-based memory,  
374 recollection involves additional prefrontal cortex activation, activation of the inferior parietal lobe and  
375 reactivation of sensory areas that are active during encoding (Skinner & Fernandes, 2007). By  
376 contrast, familiarity-based memory is associated with decreased activity of the perihinal cortex and  
377 rhinal cortex (Skinner & Fernandes, 2007), and is unaffected by reduced attention at encoding  
378 (Curran, 2004). Whether emotion interacts with familiarity- and recollection-based memory and their  
379 neural correlates under conditions of divided attention is a question needing to be addressed by future  
380 research.

## ATTENTION AND EMOTIONAL MEMORY

354        Additionally, alternate EEG methods may be more suited to investigating the attention-emotion  
355 interaction. Evidence suggests oscillatory dynamics may be more reflective of attention-related  
356 cortical activity than ERPs (Yordanova, Kolev & Polich, 2001). Oscillatory activity provides useful  
357 information on the physiology of brain dynamics, with research demonstrating alpha-band activity (8  
358 – 12 Hz) reliably indexes fluctuations in cortical excitation, and has been shown to be sensitive to  
359 emotional stimuli (Foxy & Snyder, 2011; Güntekin & Başar, 2014; Klimesch, 2012; Payne & Sekular,  
360 2014; Uusberg et al., 2013). Studies (Aftanas et al., 2002; Güntekin & Başar, 2007; Onoda et al.,  
361 2007; Uusberg et al., 2013) have reported an increase in alpha desynchronisation in response to  
362 aversive (e.g., mutilated human bodies) compared to positive and neutral stimuli, suggesting a  
363 decrease in alpha power in response to emotional information may reflect enhanced neuronal  
364 excitation induced by affective attention, whereby attention is rendered to emotional stimuli for  
365 heightened sensory processing. This interpretation is consistent with behavioural findings of valence-  
366 induced changes in attention at encoding and superior performance for emotional stimuli at recall  
367 (MacKay et al., 2004; Riggs et al., 2011).

368        The adoption of alternative electrophysiological measurements, such as analyses of oscillatory  
369 activity, would be complemented by comparing attention-related memory enhancement with factors  
370 known to facilitate memory consolidation, such as sleep (Rasch & Born, 2013). Due to a  
371 disengagement from the external inputs of wakefulness, sleep is argued to provide a suitable  
372 environment for offline processes to facilitate localised synaptic downscaling and the distribution of  
373 hippocampally stored information into LTM (Ellenbogen, Hulbert, Stickgold, Dinges & Thompson-  
374 Schill, 2006; Rasch & Born, 2013). Using fMRI, Sterpenich et al. (2009) revealed sleep promoted the  
375 reorganisation of neuronal representations of emotional pictures, such that greater picture recognition  
376 accuracy after sleep compared to time awake was associated with enhanced activation of the ventral  
377 medial prefrontal cortex, an area involved in memory retrieval, and the extended amygdala, a region  
378 involved in modulating emotional information at encoding. These findings are in line with Bennion et  
379 al. (2015b), who found that that memory for emotional information was greater after a period of sleep  
380 versus wake, and this was mediated by cortisol levels at encoding. Further, the beneficial role of sleep



## ATTENTION AND EMOTIONAL MEMORY

354 on memory has more recently been documented with a 90 minute nap (Payne et al., 2015), suggesting  
355 that even after brief periods, sleep actively influences long-term, system-level consolidation for  
356 emotional content. However, no study has directly examined the interaction between attention and  
357 sleep on emotional memory consolidation, limiting the ability to establish whether emotional memory  
358 benefits from enhanced attention at encoding, or from post-encoding (i.e. sleep-dependent) memory  
359 consolidation.

### 360 **5. Conclusions**

361 This systematic review and meta-analysis aimed to determine whether attention significantly  
362 impacts memory for emotional stimuli. A secondary aim was to determine whether there was  
363 homogeneity between behavioural, electrophysiological, and neuroanatomical correlates for the effect  
364 of attention on emotional memory. Overall, attention plays a significant role in facilitating memory of  
365 emotional over neutral information, and this effect was reported across behavioural, eye-tracking and  
366 neuroimaging studies. The electrophysiological correlates of the attention-emotion memory  
367 interaction appear to be more reliably indexed by ERP components later in the processing cascade,  
368 such as the LPP; however, the role of sensory-related components may be better explored by  
369 systematically manipulating attentional demands. Neuroanatomically, increased activation of the  
370 amygdala, ventral visual stream and vmPFC were reported under conditions of divided attention,  
371 suggesting these regions interact to prioritise emotional over neutral information. However, despite  
372 extensive research, examinations of the eye-tracking and neural correlates of attention and emotional  
373 LTM are inconsistent. This inconsistency likely reflects differences in emotional stimuli, paradigms,  
374 and recall intervals, and as such, future research should better control for these methodological  
375 parameters. Further, although ERPs are useful in assessing the temporal processing of attention to  
376 emotional stimuli, future research should examine changes in oscillatory dynamics. Finally,  
377 investigating the interaction between attention and sleep may further our understanding of whether  
378 emotional memory depends on attention at encoding, enhanced consolidation processes, or an  
379 interaction between the two.

### 380 **Conflict of Interest**

## ATTENTION AND EMOTIONAL MEMORY

354 The authors declare no conflicts of interest.

355

### 356 **Acknowledgements**

357 ZRC is supported by a Research Training Program Scholarship awarded by the Australian

358 Commonwealth Government (ID: 212190). We thank Professor Ina Bornkessel-Schlesewsky for

359 helpful comments on an earlier version of this manuscript.

360

### **References**

361 Aftanas, L. I., Varlamov, A. A., Pavlov, S. V., Makhnev, V. P., & Reva, N. V. (2002). Time-  
362 dependent cortical asymmetries induced by emotional arousal: EEG analysis of event-related  
363 synchronization and desynchronization in individually defined frequency bands. *International*  
364 *Journal of Psychophysiology*, *44*(1), 67-82. doi: 10.1016/S0167-8760(01)00194-5

365 Aquino, J. M., & Arnell, K. M. (2007). Attention and the processing of emotional words: Dissociating  
366 effects of arousal. *Psychonomic Bulletin & Review*, *14*(3), 430-435. doi:  
367 10.3758/BF03194084

368 Barnacle, G. E., Montaldi, D., Talmi, D., & Sommer, T. (2016). The list-composition effect in  
369 memory for emotional and neutral pictures: Differential contribution of ventral and dorsal  
370 attention networks to successful encoding. *Neuropsychologia*, *90*, 125-135.

371 Bennion, K. A., Ford, J. H., Murray, B. D., & Kensinger, E. A. (2013a). Oversimplification in the  
372 study of emotional memory. *Journal of the International Neuropsychological Society*, *19*(09),  
373 953-961. doi: 10.1017/S1355617713000945

374 Bennion, K. A., Mickley Steinmetz, K. R., Kensinger, E. A., & Payne, J. D. (2013b). Sleep and  
375 cortisol interact to support memory consolidation. *Cerebral Cortex*, *25*(3), 646-657.

376 Bi, D., & Han, B. (2015). Age-related differences in attention and memory toward emotional stimuli.  
377 *PsyCh journal*, *4*(3), 155-159.

378 Bradley, M. M. (2009). Natural selective attention: Orienting and emotion. *Psychophysiology*, *46*(1),  
379 1-11. doi: 10.1111/j.1469-8986.2008.00702.x

380 Brewin, C. R., Kleiner, J. S., Vasterling, J. J., & Field, A. P. (2007). Memory for emotionally neutral  
381 information in posttraumatic stress disorder: A meta-analytic investigation. *Journal of*  
382 *Abnormal Psychology*, *116*(3), 448.

383 Brosch, T., & Van Bavel, J. J. (2012). The flexibility of emotional attention: Accessible social  
384 identities guide rapid attentional orienting. *Cognition*, *125*(2), 309-316. doi:  
385 10.1016/j.cognition.2012.07.007

386 Brown, S. B., Van der Wee, N. J., Van Noorden, M. S., Giltay, E. J., & Nieuwenhuis, S. (2015).  
387 Noradrenergic and cholinergic modulation of late ERP responses to deviant  
388 stimuli. *Psychophysiology*, *52*(12), 1620-1631. doi: 10.1111/psyp.12544

## ATTENTION AND EMOTIONAL MEMORY

- 354 Brown, S. B., van Steenbergen, H., Band, G. P., de Rover, M., & Nieuwenhuis, S. (2012). Functional  
355 significance of the emotion-related late positive potential. *Frontiers in Human*  
356 *Neuroscience*, 6, 33. doi: 10.3389/fnhum.2012.00033
- 357 Carretié, L., Hinojosa, J. A., Martín-Loeches, M., Mercado, F., & Tapia, M. (2004). Automatic  
358 attention to emotional stimuli: neural correlates. *Human Brain Mapping*, 22(4), 290-299. doi:  
359 10.1002/hbm.20037
- 360 Carretié, L., Martín-Loeches, M., Hinojosa, J. A., & Mercado, F. (2001). Emotion and attention  
361 interaction studied through event-related potentials. *Journal of Cognitive*  
362 *Neuroscience*, 13(8), 1109-1128. doi: 10.1162/089892901753294400
- 363 Chan, M., Madan, C. R., & Singhal, A. (2016). The effects of taboo-related distraction on driving  
364 performance. *Acta psychologica*, 168, 20-26.
- 365 Chan, M., & Singhal, A. (2013). The emotional side of cognitive distraction: Implications for road  
366 safety. *Accident Analysis & Prevention*, 50, 147-154. doi: 10.1016/j.aap.2012.04.004
- 367 Chan, M., & Singhal, A. (2015). Emotion matters: Implications for distracted driving. *Safety Science*,  
368 72, 302-309.
- 369 Chang, Y., & Choi, S. (2014). Effects of seductive details evidenced by gaze duration. *Neurobiology*  
370 *of Learning and Memory*, 109, 131-138. doi: 10.1016/j.nlm.2014.01.005
- 371 Chapman, H. A., Johannes, K., Poppenk, J. L., Moscovitch, M., & Anderson, A. K. (2012). Evidence  
372 for the differential salience of disgust and fear in episodic memory. *Journal of Experimental*  
373 *Psychology: General*, 142(4), 1100. doi: 10.1037/a0030503
- 374 Chatburn, A., Lushington, K., & Kohler, M. J. (2014). Complex associative memory processing and  
375 sleep: A systematic review and meta-analysis of behavioural evidence and underlying EEG  
376 mechanisms. *Neuroscience & Biobehavioral Reviews*, 47, 646-655. doi:  
377 10.1016/j.neubiorev.2014.10.018
- 378 Chipchase, S. Y., & Chapman, P. (2013). Trade-offs in visual attention and the enhancement of  
379 memory specificity for positive and negative emotional stimuli. *The Quarterly Journal of*  
380 *Experimental Psychology*, 66(2), 277-298. doi: 10.1080/17470218.2012.707664
- 381 Christianson, S. Å. (1992). Emotional stress and eyewitness memory: A critical review. *Psychological*  
382 *Bulletin*, 112(2), 284. doi: 10.1037/0033-2909.112.2.284
- 383 Christianson, S. Å., Loftus, E. F., Hoffman, H., & Loftus, G. R. (1991). Eye fixations and memory for  
384 emotional events. *Journal of Experimental Psychology: Learning, Memory, and*  
385 *Cognition*, 17(4), 693. doi: 10.1037/0278-7393.17.4.693
- 386 Clemens, B., Regenbogen, C., Koch, K., Backes, V., Romanczuk-Seiferth, N., Pauly, K., ... &  
387 Kellermann, T. (2015). Incidental memory encoding assessed with signal detection theory and  
388 functional magnetic resonance imaging (fMRI). *Frontiers in Behavioral Neuroscience*, 9.
- 389 Cohen, J., 1992. A power primer. *Psychological Review Bulletin*, 112(1), 155-159. doi:  
390 10.1037/0033-2909.112.1.155
- 391 Corbetta, M., & Shulman, G. L. (2002). Control of goal-directed and stimulus-driven attention in the  
392 brain. *Nature Reviews Neuroscience*, 3(3), 201-215. doi: 10.1038/nrn755

## ATTENTION AND EMOTIONAL MEMORY

- 354 Crowley, K. E., & Colrain, I. M. (2004). A review of the evidence for P2 being an independent  
355 component process: Age, sleep and modality. *Clinical Neurophysiology*, *115*, 732-744. doi:  
356 10.1016/j.clinph.2003.11.021
- 357 Curran, T. (2004). Effects of attention and confidence on the hypothesized ERP correlates of  
358 recollection and familiarity. *Neuropsychologia*, *42*(8), 1088-1106. doi:  
359 10.1016/j.neuropsychologia.2003.12.011
- 360 Delplanque, S., Lavoie, M. E., Hot, P., Silvert, L., & Sequeira, H. (2004). Modulation of cognitive  
361 processing by emotional valence studied through event-related potentials in  
362 humans. *Neuroscience letters*, *356*(1), 1-4. doi: 10.1016/j.neulet.2003.10.014
- 363 Ellenbogen, J. M., Hulbert, J. C., Stickgold, R., Dinges, D. F., & Thompson-Schill, S. L. (2006).  
364 Interfering with theories of sleep and memory: sleep, declarative memory, and associative  
365 interference. *Current Biology*, *16*(13), 1290-1294.
- 366 Evaraert, J., & Koster, E. H. (2015). Interactions among emotional attention, encoding, and retrieval  
367 of ambiguous information. An eye-tracking study. *Emotion*, *15*(5), 539-543. doi:  
368 10.1037/emo0000063
- 369 Field, A. P., & Gillett, R. (2010). How to do a meta-analysis. *British Journal of Mathematical and*  
370 *Statistical Psychology*, *63*(3), 665-694.
- 371 Foxe, J. J., & Snyder, A. C. (2011). The role of alpha-band brain oscillations as a sensory suppression  
372 mechanism during selective attention. *Frontiers in Psychology*, *2*, 1-13. doi:  
373 10.3389/fpsyg.2011.00154
- 374 Frank, D. W., & Sabatinelli, D. (2012). Stimulus-driven reorienting in the ventral frontoparietal  
375 attention network: the role of emotional content. *Frontiers in Human Neuroscience*, *6*.
- 376 Friston, K. (2010). The free-energy principle: A unified brain theory? *Nature Reviews: Neuroscience*,  
377 *11*(2), 127-138. doi: 10.1038/nrn2787
- 378 Friston, K., Adams, R. A., Perrinet, L., & Breakspear, M. (2012). Perceptions as hypotheses: Saccades  
379 as experiments. *Frontiers in Psychology*, *3*(151), 1-20. doi: 10.3389/fpsyg.2012.00151
- 380 Güntekin, B., & Başar, E. (2007). Emotional face expressions are differentiated with brain  
381 oscillations. *International Journal of Psychophysiology*, *64*(1), 91-100. doi:  
382 10.1016/j.ijpsycho.2006.07.003
- 383 Güntekin, B., & Başar, E. (2014). A review of brain oscillations in perception of faces and emotional  
384 pictures. *Neuropsychologia*, *58*, 33-51. doi: 10.1016/j.neuropsychologia.2014.03.014
- 385 Herbert, C., Junghofer, M., & Kissler, J. (2008). Event-related potentials to emotional adjectives  
386 during reading. *Psychophysiology*, *45*(3), 487-498.
- 387 Hedges, L. V., & Vevea, J. L. (1998). Fixed-and random-effects models in meta-analysis.  
388 *Psychological methods*, *3*(4), 486.
- 389 Holland, A. C., & Kensinger, E. A. (2012). Younger, middle-aged, and older adults' memories for the  
390 2008 U.S. Presidential Election. *Journal of Applied Research in Memory and Cognition*, *1*(3),  
391 163-170. doi: 10.1016/j.jarmac.2012.06.001

## ATTENTION AND EMOTIONAL MEMORY

- 354 Humphreys, L., Underwood, G., & Chapman, P. (2010). Enhanced memory for emotional pictures: A  
355 product of increased attention to affective stimuli? *European Journal of Cognitive*  
356 *Psychology*, 22(8), 1235-1247. doi: 10.1080/09541440903427487
- 357 Joffily, M., & Coricelli, G. (2013). Emotional valence and the free-energy principle. *PLoS*  
358 *Computational Biology*, 9(6), e1003094.
- 359 Junghöfer, M., Bradley, M. M., Elbert, T. R., & Lang, P. J. (2001). Fleeting images: a new look at  
360 early emotion discrimination. *Psychophysiology*, 38(02), 175-178. doi: 10.1111/1469-  
361 8986.3820175
- 362 Kang, C., Wang, Z., Surina, A., & Lü, W. (2014). Immediate emotion-enhanced memory dependent  
363 on arousal and valence: the role of automatic and controlled processing. *Acta*  
364 *Psychologica*, 150, 153-160. doi: 10.1016/j.actpsy.2014.05.008
- 365 Kanske, P., Plitschka, J., & Kotz, S. A. (2011). Attentional orienting towards emotion: P2 and N400  
366 ERP effects. *Neuropsychologia*, 49(11), 3121-3129.
- 367 Keightley, M. L., Winocur, G., Graham, S. J., Mayberg, H. S., Hevenor, S. J., & Grady, C. L. (2003).  
368 An fMRI study investigating cognitive modulation of brain regions associated with emotional  
369 processing of visual stimuli. *Neuropsychologia*, 41(5), 585-596.
- 370 Kensinger, E. A. (2009). What factors need to be considered to understand emotional memories?  
371 *Emotion Review*, 1(2), 120-121. doi: 10.1177/1754073908100436
- 372 Kensinger, E. A., Piguet, O., Krendl, A. C., & Corkin, S. (2005). Memory for contextual details:  
373 effects of emotion and aging. *Psychology and Aging*, 20(2), 241. doi: 10.1037/0882-  
374 7974.20.2.241
- 375 Keuper, K., Zwanzger, P., Nordt, M., Eden, A., Laeger, I., Zwitterlood, P., ... & Dobel, C. (2014).  
376 How 'love' and 'hate' differ from 'sleep': Using combined electro/magnetoencephalographic  
377 data to reveal the sources of early cortical responses to emotional words. *Human Brain*  
378 *Mapping*, 35(3), 875-888. doi: 10.1002/hbm.22220
- 379 Kim, J. S. C., Vossel, G., & Gamer, M. (2013). Effects of emotional context on memory for details:  
380 the role of attention. *PloS one*, 8(10), e77405. doi: 10.1371/journal.pone.0077405
- 381 Kissler, J., Herbert, C., Winkler, I., & Junghofer, M. (2009). Emotion and attention in visual word  
382 processing—An ERP study. *Biological Psychology*, 80(1), 75-83. doi:  
383 10.1016/j.biopsycho.2008.03.004
- 384 Klimesch, W. (2012). Alpha-band oscillations, attention, and controlled access to stored information.  
385 *Trends in Cognitive Neuroscience*, 16(12), 606-617. doi: doi:10.1016/j.tics.2012.10.007
- 386 Koenig, S., & Mecklinger, A. (2008). Electrophysiological correlates of encoding and retrieving  
387 emotional events. *Emotion*, 8(2), 162. doi: 10.1037/1528-3542.8.2.162
- 388 LaBar, K. S., & Cabeza, R. (2006). Cognitive neuroscience of emotional memory. *Nature Reviews*  
389 *Neuroscience*, 7(1), 54-64. doi: 10.1038/nrn1825
- 390 Lang, P. J., Bradley, M. M., & Cuthbert, B. N. (1998). Emotion and motivation: Measuring affective  
391 perception. *Journal of Clinical Neurophysiology*, 15(5), 397-408.

## ATTENTION AND EMOTIONAL MEMORY

- 354 Lang, P. J., Bradley, M. M., & Cuthbert, B. N. (1998). Emotion, motivation, and anxiety: Brain  
355 mechanisms and psychophysiology. *Biological psychiatry*, *44*(12), 1248-1263.
- 356 Langeslag, S. J., Olivier, J. R., Köhlen, M. E., Nijs, I. M., & Van Strien, J. W. (2015). Increased  
357 attention and memory for beloved-related information during infatuation: Behavioral and  
358 electrophysiological data. *Social Cognitive and Affective Neuroscience*, *1*(1), 1-9. doi:  
359 10.1093/scan/nsu034
- 360 Leppänen, J. M. (2006). Emotional information processing in mood disorders: a review of behavioral  
361 and neuroimaging findings. *Current Opinion in Psychiatry*, *19*(1), 34-39. doi:  
362 10.1097/01.yco.0000191500.46411.00
- 363 Liberati, A., Altman, D. G., Tetzlaff, J., Mulrow, C., Gøtzsche, P. C., Ioannidis, J. P., ... & Moher, D.  
364 (2009). The PRISMA statement for reporting systematic reviews and meta-analyses of studies  
365 that evaluate health care interventions: explanation and elaboration. *Annals of Internal  
366 Medicine*, *151*(4), W-65.
- 367 Low, A., Lang, P. J., & Bradley, M. M. (2005). What pops out during rapid picture  
368 presentation? *Psychophysiology*, *42*, S81.
- 369 Luck, S. J. (2014). *An Introduction to the Event-Related Potential Technique*. MIT Press.
- 370 MacKay, D. G., Johnson, L. W., Graham, E. R., & Burke, D. M. (2015). Aging, emotion, attention,  
371 and binding in the taboo stroop task: data and theories. *International Journal of  
372 Environmental Research and Public Health*, *12*(10), 12803-12833.
- 373 Mackay, D. G., Shafto, M., Taylor, J. K., Marian, D. E., Abrams, L., & Dyer, J. R. (2004). Relations  
374 between emotion, memory, and attention: Evidence from taboo Stroop, lexical decision, and  
375 immediate memory tasks. *Memory & Cognition*, *32*(3), 474-488. doi: 10.3758/BF03195840
- 376 Maddox, G. B., Naveh-Benjamin, M., Old, S., & Kilb, A. (2012). The role of attention in the  
377 associative binding of emotionally arousing words. *Psychonomic Bulletin & Review*, *19*(6),  
378 1128-1134. doi: 10.3758/s13423-012-0315-x
- 379 Mather, M., & Carstensen, L. L. (2003). Aging and attentional biases for emotional  
380 faces. *Psychological Science*, *14*(5), 409-415.
- 381 Murty, V. P., Ritchey, M., Adcock, R. A., & LaBar, K. S. (2010). fMRI studies of successful  
382 emotional memory encoding: A quantitative meta-analysis. *Neuropsychologia*, *48*(12), 3459-  
383 3469. doi: 10.1016/j.neuropsychologia.2010.07.030
- 384 Payne, J. D., Kensinger, E. A., Wamsley, E. J., Spreng, R. N., Alger, S. E., Gibler, K., ... & Stickgold,  
385 R. (2015). Napping and the selective consolidation of negative aspects of  
386 scenes. *Emotion*, *15*(2), 176. doi: 10.1037/a0038683
- 387 Payne, L., & Sekuler, R. (2014). The importance of ignoring: Alpha oscillations protect  
388 selectivity. *Current Directions in Psychological Science*, *23*(3), 171-177. doi:  
389 10.1177/0963721414529145
- 390 Payne, J. D., Stickgold, R., Swanberg, K., & Kensinger, E. A. (2008). Sleep preferentially enhances  
391 memory for emotional components of scenes. *Psychological Science*, *19*(8), 781-788. doi:  
392 10.1111/j.1467-9280.2008.02157.x

## ATTENTION AND EMOTIONAL MEMORY

- 354 Peyk, P., Schupp, H. T., Elbert, T., & Junghofer, M. (2008). Emotion processing in the visual brain: A  
355 MEG analysis. *Brain Topography*, *20*, 205-215.
- 356 Pichora-Fuller, M. K., Dupuis, K., & Smith, S. L. (2016). Effects of vocal emotion on memory in  
357 younger and older adults. *Experimental Aging Research*, *42*(1), 14-30.
- 358 Okon-Singer, H., Hendler, T., Pessoa, L., & Shackman, A. J. (2015). The neurobiology of emotion-  
359 cognition interactions: Fundamental questions and strategies for future research. *Frontiers in*  
360 *Human Neuroscience*, *9*(58), 1-14. doi: 10.3389/fnhum.2015.00058
- 361 Onoda, K., Okamoto, Y., Shishida, K., Hashizume, A., Ueda, K., Yamashita, H., et al. (2007).  
362 Anticipation of affective images and event-related desynchronization (ERD) of alpha activity:  
363 An MEG study. *Brain Research*, *1151*, 134–141. doi: 10.1016/j.brainres.2007.03.026
- 364 Rasch, B., & Born, J. (2013). About sleep's role in memory. *Physiological Review*, *93*(2), 681-786.  
365 doi: 10.1152/physrev.00032.2012
- 366 Riggs, L., McQuiggan, D. A., Farb, N., Anderson, A. K., & Ryan, J. D. (2011). The role of overt  
367 attention in emotion-modulated memory. *Emotion*, *11*(4), 776. doi: 10.1037/a0022591
- 368 Sakaki, M., Niki, K., & Mather, M. (2012). Beyond arousal and valence: The importance of the  
369 biological versus social relevance of emotional stimuli. *Cognitive, Affective, & Behavioral*  
370 *Neuroscience*, *12*(1), 115-139. doi: 10.3758/s13415-011-0062-x
- 371 Samuels, E. R., & Szabadi, E. (2008). Functional neuroanatomy of the noradrenergic locus coeruleus:  
372 Its roles in the regulation of arousal and autonomic function Part 1: Principles of functional  
373 organisation. *Current Neuropharmacology*, *6*(3), 235-253. doi:  
374 10.2174/157015908785777229
- 375 Schupp, H. T., Flaisch, T., Stockburger, J., & Junghofer, M. (2006). Emotion and attention: Event-  
376 related brain potential studies. *Progress in Brain Research*, *156*, 31-51.
- 377 Sharot, T., & Phelps, E. A. (2004). How arousal modulates memory: Disentangling the effects of  
378 attention and retention. *Cognitive, Affective, & Behavioral Neuroscience*, *4*(3), 294-306. doi:  
379 10.3758/CABN.4.3.294
- 380 Sharot, T., Davidson, M. L., Carson, M. M., & Phelps, E. A. (2008). Eye movements predict  
381 recollective experience. *PLoS One*, *3*(8), e2884. doi: 10.1371/journal.pone.0002884
- 382 Skinner, E. I., & Fernandes, M. A. (2007). Neural correlates of recollection and familiarity: A review  
383 of neuroimaging and patient data. *Neuropsychologia*, *45*(10), 2163-2179. doi:  
384 10.1016/j.neuropsychologia.2007.03.007
- 385 Smith, A. P., Henson, R. N., Dolan, R. J., & Rugg, M. D. (2004). fMRI correlates of the episodic  
386 retrieval of emotional contexts. *NeuroImage*, *22*(2), 868-878. doi:  
387 10.1016/j.neuroimage.2004.01.049
- 388 Smith, A. P., Stephan, K. E., Rugg, M. D., & Dolan, R. J. (2006). Task and content modulate  
389 amygdala-hippocampal connectivity in emotional retrieval. *Neuron*, *49*(4), 631-638. doi:  
390 10.1016/j.neuron.2005.12.025
- 391 Srinivasan, N., & Gupta, R. (2010). Emotion-attention interactions in recognition memory for  
392 distractor faces. *Emotion*, *10*(2), 207. doi: 10.1037/a0018487

## ATTENTION AND EMOTIONAL MEMORY

- 354 Steinmetz, K. R. M., & Kensinger, E. A. (2013). The emotion-induced memory trade-off: More than  
355 an effect of overt attention? *Memory & cognition*, *41*(1), 69-81. doi: 10.3758/s13421-012-  
356 0247-8
- 357 Steinmetz, K. R. M., Waring, J. D., & Kensinger, E. A. (2014). The effect of divided attention on  
358 emotion-induced memory narrowing. *Cognition & Emotion*, *28*(5), 881-892.
- 359 Sterpenich, V., Albouy, G., Darsaud, A., Schmidt, C., Vandewalle, G., Vu, T. T. D., ... & Maquet, P.  
360 (2009). Sleep promotes the neural reorganization of remote emotional memory. *The Journal*  
361 *of Neuroscience*, *29*(16), 5143-5152. doi: 10.1523/JNEUROSCI.0561-09.2009
- 362 Talmi, D., & McGarry, L. M. (2012). Accounting for immediate emotional memory enhancement.  
363 *Journal of Memory and Language*, *66*(1), 93-108. doi: 10.1016/j.jml.2011.07.009
- 364 Talmi, D., Anderson, A. K., Riggs, L., Caplan, J. B., & Moscovitch, M. (2008). Immediate memory  
365 consequences of the effect of emotion on attention to pictures. *Learning & Memory*, *15*(3),  
366 172-182. doi: 10.1101/lm.722908
- 367 Talmi, D., Schimmack, U., Paterson, T., & Moscovitch, M. (2007). The role of attention and  
368 relatedness in emotionally enhanced memory. *Emotion*, *7*(1), 89. doi: 10.1037/1528-  
369 3542.7.1.89
- 370 Taylor, J. G., & Fragopanagos, N. F. (2005). The interaction of attention and emotion. *Neural*  
371 *Networks*, *18*(4), 353-369. doi: 10.1016/j.neunet.2005.03.005
- 372 Thorpe, S., Fize, D., & Marlot, C. (1996). Speed of processing in the human visual  
373 system. *Nature*, *381*(6582), 520-522. doi: 10.1038/381520a0
- 374 Tully, K., & Bolshakov, V. Y. (2010). Emotional enhancement of memory: how norepinephrine  
375 enables synaptic plasticity. *Molecular Brain*, *3*(1), 15. doi: 10.1186/1756-6606-3-15
- 376 Uusberg, A., Uibo, H., Kreegipuu, K., & Allik, J. (2013). EEG alpha and cortical inhibition in  
377 affective attention. *International Journal of Psychophysiology*, *89*(1), 26-36. doi:  
378 10.1016/j.ijpsycho.2013.04.020
- 379 Vevea, J. L., & Woods, C. M. (2005). Publication bias in research synthesis: sensitivity analysis using  
380 a priori weight functions. *Psychological Methods*, *10*(4), 428.
- 381 Vuilleumier, P. (2005). How brains beware: Neural mechanisms of emotional attention. *Trends in*  
382 *Cognitive Sciences*, *9*(12), 585-594. doi: 10.1016/j.tics.2005.10.011
- 383 Vuilleumier, P., Armony, J. L., Clarke, K., Husain, M., Driver, J., Dolan, R. J. (2002). Neural  
384 responses to emotional faces with and without awareness: Event-related fMRI in a parietal  
385 patient with visual extinction and spatial neglect. *Neuropsychologia*, *40*(12), 2156-2166. doi:  
386 10.1016/S0028-3932(02)00045-3
- 387 Wessel, I., De Kooy, P. V., & Merckelbach, H. (2000). Differential recall of central and peripheral  
388 details of emotional slides is not a stable phenomenon. *Memory*, *8*(2), 95-109. doi:  
389 10.1080/096582100387641
- 390 Yordanova, J., Kolev, V., & Polich, J. (2001). P300 and alpha event-related desynchronization  
391 (ERD). *Psychophysiology*, *38*(1), 143-152. doi: 10.1111/1469-8986.3810143



## ATTENTION AND EMOTIONAL MEMORY

- 354 Zhang, Q., Liu, X., An, W., Yang, Y., & Wang, Y. (2015). Recognition memory of neutral words can  
355 be impaired by task-irrelevant emotional encoding contexts: Behavioral and  
356 electrophysiological evidence. *Frontiers in Human Neuroscience*, 9(73), 1-12. doi:  
357 10.3389/fnhum.2015.00073
- 358 Ziaei, M., von Hippel, W., Henry, J. D., & Becker, S. I. (2015). Are age effects in positivity  
359 influenced by the valence of distractors? *PloS one*, 10(9), e0137604.
